# Supplementary material for: Effectiveness and harms of high-flow nasal oxygen (HFNO) for acute respiratory failure: a systematic review protocol
Source: PubMed Central journal article supplement — BMJ Open. 2020 Feb 12;10(2):e034956. doi: 10.1136/bmjopen-2019-034956 (PMC7044882; doi:10.1136/bmjopen-2019-034956), 2020-02-12
Supplement: bmjopen-2019-034956.draft_revisions.pdf [file bmjopen-2019-034956.draft_revisions.pdf]

# BMJ Open

BMJ Open is committed to open peer review. As part of this commitment we make the peer review history of every article we publish publicly available.

When an article is published we post the peer reviewers' comments and the authors' responses online. We also post the versions of the paper that were used during peer review. These are the versions that the peer review comments apply to.

The versions of the paper that follow are the versions that were submitted during the peer review process. They are not the versions of record or the final published versions. They should not be cited or distributed as the published version of this manuscript.

BMJ Open is an open access journal and the full, final, typeset and author-corrected version of record of the manuscript is available on our site with no access controls, subscription charges or pay-per-view fees (<http://bmjopen.bmj.com>).

If you have any questions on BMJ Open's open peer review process please email [info.bmjopen@bmj.com](mailto:info.bmjopen@bmj.com)

# BMJ Open

## High-flow nasal oxygen (HFNO) for hospitalized patients: a systematic review protocol

|                               |                                                                                                                                                                                                                                                                                                                                                                                                                                                                                                                                                                                                                                                                                                                                                    |
|-------------------------------|----------------------------------------------------------------------------------------------------------------------------------------------------------------------------------------------------------------------------------------------------------------------------------------------------------------------------------------------------------------------------------------------------------------------------------------------------------------------------------------------------------------------------------------------------------------------------------------------------------------------------------------------------------------------------------------------------------------------------------------------------|
| Journal:                      | <i>BMJ Open</i>                                                                                                                                                                                                                                                                                                                                                                                                                                                                                                                                                                                                                                                                                                                                    |
| Manuscript ID                 | bmjopen-2019-034956                                                                                                                                                                                                                                                                                                                                                                                                                                                                                                                                                                                                                                                                                                                                |
| Article Type:                 | Protocol                                                                                                                                                                                                                                                                                                                                                                                                                                                                                                                                                                                                                                                                                                                                           |
| Date Submitted by the Author: | 15-Oct-2019                                                                                                                                                                                                                                                                                                                                                                                                                                                                                                                                                                                                                                                                                                                                        |
| Complete List of Authors:     | Baldomero, Arianne; Minneapolis VA Health Care System; University of Minnesota, Pulmonary, Allergy, Critical Care, and Sleep Medicine<br>Melzer, Anne; Minneapolis VA Health Care System; University of Minnesota, Pulmonary, Allergy, Critical Care, and Sleep Medicine<br>Greer, Nancy; Minneapolis VA Health Care System, Center for Care Delivery and Outcomes Research<br>Majeski, Brittany; Minneapolis VA Health Care System, Center for Care Delivery and Outcomes Research<br>Macdonald, Roderick; Minneapolis VA Health Care System, Center for Care Delivery and Outcomes Research<br>Wilt, Timothy; Minneapolis VA Health Care System, Center for Care Delivery and Outcomes Research; University of Minnesota, Department of Medicine |
| Keywords:                     | RESPIRATORY MEDICINE (see Thoracic Medicine), INTERNAL MEDICINE, INTENSIVE & CRITICAL CARE, Adult thoracic medicine < THORACIC MEDICINE, GENERAL MEDICINE (see Internal Medicine), Adult intensive & critical care < INTENSIVE & CRITICAL CARE                                                                                                                                                                                                                                                                                                                                                                                                                                                                                                     |
|                               |                                                                                                                                                                                                                                                                                                                                                                                                                                                                                                                                                                                                                                                                                                                                                    |

SCHOLARONE™  
Manuscripts

HFNO for hospitalized patients: a systematic review protocol  
Date: 10/15/19

## PROTOCOL:

# High-flow nasal oxygen (HFNO) for hospitalized patients: a systematic review protocol

### Authors' full names:

Arianne K. Baldomero, MD, MS<sup>1,2</sup>

Anne Melzer, MD, MS<sup>1,2</sup>

Nancy Greer, PhD<sup>3</sup>

Brittany N. Majeski, BA<sup>3</sup>

Roderick MacDonald, MS<sup>3</sup>

Timothy J. Wilt, MD, MPH<sup>3,4</sup>

### Authors' affiliation(s):

1: Division of Pulmonary, Allergy, Critical Care, and Sleep Medicine, Department of Medicine, Minneapolis Veterans Affairs Healthcare System, Minneapolis, MN, USA

2: Division of Pulmonary, Allergy, Critical Care, and Sleep Medicine, Department of Medicine, University of Minnesota, Minneapolis, MN, USA

3: Center for Care Delivery and Outcomes Research, Minneapolis Veterans Affairs Healthcare System, Minneapolis, MN, USA

4: Department of Medicine, University of Minnesota, Minneapolis, MN, USA

HFNO for hospitalized patients: a systematic review protocol  
Date: 10/15/19

25 **Corresponding author full contact details:**

26 Name: Arianne Baldomero, MD, MS

27 Address: 1 Veterans Drive,

28 Post code: Pulmonary 111N

29 City: Minneapolis, MN

30 Country: USA

31 Email: baldo004@umn.edu

32

33

34

35

HFNO for hospitalized patients: a systematic review protocol

Date: 10/15/19

1  
2  
3 36 **ABSTRACT**  
4 37

5  
6 38 **Introduction**  
7

8 39 High-flow nasal oxygen (HFNO) therapy use in adults hospitalized with acute respiratory  
9  
10 40 failure (ARF) is increasing. However, evidence to support widespread use of HFNO compared  
11  
12 41 to noninvasive ventilation (NIV) and conventional oxygen therapy (COT) is lacking. This protocol  
13  
14 42 describes the methods for a systematic evidence review regarding the comparative  
15  
16 43 effectiveness and harms of HFNO compared to NIV or COT for the management of ARF in  
17  
18 44 hospitalized adult patients.  
19  
20  
21 45

22  
23 46 **Methods and analysis**  
24

25 47 We searched MEDLINE®, Embase, CINAHL, and Cochrane Library for randomized-  
26  
27 48 controlled trials (RCTs) of adult patients hospitalized with ARF defined as SpO<sub>2</sub> <90%,  
28  
29 49 PaO<sub>2</sub>:FiO<sub>2</sub> ratio ≤300, PaO<sub>2</sub> ≤60 mmHg, or PaCO<sub>2</sub> ≥45 mmHg. The intervention is HFNO  
30  
31 50 (humidified oxygen, flow rate ≥20 L/min) compared to NIV or COT. The critical outcomes are:  
32  
33 51 mortality, hospital-acquired pneumonia, intubation/reintubation (days of intubation), intensive  
34  
35 52 care unit (ICU) admission and ICU transfers, patient comfort, and hospital length of stay. The  
36  
37 53 important outcomes are: delirium, 30-day hospital readmissions, barotrauma, compromised  
38  
39 54 nutrition, gastric dysfunction, independence at discharge, discharge, and skin breakdown or  
40  
41 55 pressure ulcers. Where possible and appropriate, meta-analysis will be performed for each  
42  
43 56 outcome.  
44  
45  
46 57

47  
48 58 **Conclusion**  
49

50 59 This systematic review will provide a comprehensive evaluation of the evidence  
51  
52 60 regarding the comparative effectiveness and harms of HFNO compared to NIV or COT for the  
53  
54 61 management of ARF in hospitalized adult patients to inform clinical practice and to identify  
55  
56  
57  
58  
59



HFNO for hospitalized patients: a systematic review protocol

Date: 10/15/19

1  
2  
3  
4  
5  
6  
7  
8  
9  
10  
11  
12  
13  
14  
15  
16  
17  
18  
19  
20  
21  
22  
23  
24  
25  
26  
27  
28  
29  
30  
31  
32  
33  
34  
35  
36  
37  
38  
39  
40  
41  
42  
43  
44  
45  
46  
47  
48  
49  
50  
51  
52  
53  
54  
55  
56  
57  
58  
59  
60

- 87       ▪ The relative heterogeneity of the populations, diagnoses, settings, and outcome
- 88           measures assessed by the individual studies that will be included in this systematic
- 89           review may preclude meaningful subgroup analyses.

For peer review only

HFNO for hospitalized patients: a systematic review protocol  
Date: 10/15/19

## 91 INTRODUCTION

92 High-flow nasal oxygen (HFNO) therapy is a mode of noninvasive oxygen support that  
93 has been used in neonatal and pediatric settings for over a decade. In recent years, HFNO use  
94 in adults hospitalized with acute respiratory failure (ARF) has been increasing. HFNO delivers  
95 warmed, humidified oxygen with fraction of inspired oxygen (FiO<sub>2</sub>) up to 1.0 and maximum flow  
96 rate of 60 L/min. Several potential physiologic advantages of HFNO over noninvasive ventilation  
97 (NIV) and conventional oxygen therapy (COT) have been proposed. These include patient  
98 comfort (1, 2), improved oxygenation and ventilation (3, 4), clearance of airway secretions (5, 6),  
99 and reduced work of breathing (2, 7, 8). These theoretical benefits are attributed to HFNO  
100 delivery through small, pliable nasal cannula, washout of anatomic dead space (9), high oxygen  
101 flow rates (10, 11), generation of positive-end expiratory pressure (PEEP) (12-16), and heated  
102 humidification.

103 Given the increasing use of HFNO and the lack of robust evidence to support its  
104 widespread use in adult patients with ARF, the Minnesota Evidence Dissemination Center was  
105 commissioned by the American College of Physicians (ACP) to systematically review the  
106 evidence regarding the comparative effectiveness and harms of HFNO compared to NIV or  
107 COT for the management of ARF in hospitalized adult patients. With input from the ACP-Clinical  
108 Guidelines Committee (ACP-CGC) (17) and a technical expert panel (TEP), we developed the  
109 following key questions (KQ):

110 KQ 1. What is the comparative effectiveness of HFNO versus NIV or COT for hospitalized  
111 patients with ARF? Does comparative effectiveness of HFNO vary by patient  
112 characteristics, disease/diagnosis characteristics, protocol/device settings, or location of  
113 administration?

114



HFNO for hospitalized patients: a systematic review protocol  
Date: 10/15/19

115 KQ 2. What are the harms of HFNO versus NIV or COT for hospitalized patients with  
116 ARF? Do harms vary by patient characteristics, disease/diagnosis, protocol/device  
117 settings, or location of administration?

118

## 119 **METHODS**

120 In accordance with the guidelines, our systematic review protocol was registered with  
121 the International Prospective Register of Systematic Reviews (PROSPERO) on August 8, 2019.  
122 We will report our findings according to the Preferred Reporting Items for Systematic Reviews  
123 and Meta-Analyses (PRISMA) 2009 statement (18).

124

### 125 **Eligibility criteria**

126 All studies included in this systematic review will be selected in accordance with the  
127 PICOTS (Population, Intervention, Comparison, Outcomes, Timing, Study Design) framework:

128

#### 129 ***Population***

130 We will include all adult patients (age  $\geq 18$  years) with ARF at the time of study enrollment,  
131 defined as  $SpO_2 < 90\%$ ,  $PaO_2:FIO_2$  ratio  $\leq 300$ ,  $PaO_2 \leq 60$  mmHg, or  $PaCO_2 \geq 45$  mmHg.

132

#### 133 ***Intervention***

134 The intervention of interest is HFNO, defined as humidified oxygen with flow rates  $\geq 20$   
135 L/min.

136

#### 137 ***Comparators***

138 We will compare HFNO to NIV (continuous or bilevel positive airway pressure ventilation  
139 [CPAP or BiPAP®]) or COT (e.g. oxygen delivered through nasal cannula, simple face  
140 mask, air-entrainment mask, partial rebreathing mask, non-rebreather mask, etc).

HFNO for hospitalized patients: a systematic review protocol  
Date: 10/15/19

1  
2  
3 141

4  
5 142 **Outcome measures**

6  
7 143 We will examine several patient-related outcomes and intermediate outcomes. With input  
8  
9 144 from the ACP-CGC that included nonphysician public representatives, outcomes were  
10  
11 145 identified as critical or important. The critical outcomes are: mortality, hospital-acquired  
12  
13 146 pneumonia, intubation/reintubation (days of intubation), intensive care unit (ICU)  
14  
15 147 admission and ICU transfers, patient comfort, and hospital length of stay. The important  
16  
17 148 outcomes are: delirium, 30-day hospital readmissions, barotrauma (pneumothorax,  
18  
19 149 pneumomediastinum, pneumoperitoneum, or ventilator-induced lung injury), compromised  
20  
21 150 nutrition (enteral or parenteral nutrition), gastric dysfunction (placement of nasogastric  
22  
23 151 tube, abdominal distension, nausea, or vomiting), functional independence at discharge,  
24  
25 152 discharge disposition (home, assisted-living facility, nursing home, or long-term care  
26  
27 153 hospital), and skin breakdown or pressure ulcers. Intermediate outcomes are: respiratory  
28  
29 154 rate, PaO<sub>2</sub>/FiO<sub>2</sub> ratio, SpO<sub>2</sub>, pH, PaO<sub>2</sub>, and PCO<sub>2</sub>.

30  
31  
32 155

33  
34  
35 156 **Timing**

36  
37 157 We will include patients hospitalized for ARF or who developed ARF while hospitalized,  
38  
39 158 including patients with ARF post-extubation or post-surgery. We will exclude studies  
40  
41 159 evaluating HFNO for oxygenation support before (preoxygenation) and during intubation.

42  
43 160

44  
45 161 **Setting**

46  
47 162 We will include studies that randomized patients in the hospital (including hospital wards,  
48  
49 163 intermediate/step-down units, and intensive care units) and emergency department.

50  
51 164

52  
53 165 **Study design**

HFNO for hospitalized patients: a systematic review protocol  
Date: 10/15/19

166 Randomized controlled trials (RCTs) with full-text reports in English will be included. We  
167 will exclude non-randomized trials and observational studies.

168

### 169 **Data sources and search strategy**

170 We searched MEDLINE®, Embase, CINAHL, and Cochrane Library from January 2000  
171 to August 2019. The literature search will be updated prior to preparation of the final report. The  
172 search strategy for the MEDLINE® search is provided in Appendix A. We will search references  
173 of the primary studies and published systematic reviews for relevant studies. We will also  
174 search ClinicalTrials.gov and conference proceedings for unpublished or ongoing clinical trials.

175

### 176 **Study selection process**

177 We will conduct the study selection in two stages: stage one is abstract triage and stage  
178 two is full-text triage. All studies in stage one and stage two of the study selection process will  
179 be reviewed independently by two members of the review team. Abstracts included by one  
180 reviewer will move on to full-text review. At the full text review stage, both reviewers must agree  
181 on study inclusion or exclusion. Disagreements will be resolved through discussion and  
182 evaluation by a third reviewer, if needed.

183

### 184 **Data extraction and management**

185 Data extraction forms will be piloted by three members of the review team. Final data  
186 extraction will be conducted by one investigator with verification by a second team member.  
187 Disagreements in data extraction will be resolved by consensus that includes the senior  
188 investigator (TJW). Data that will be extracted include information related to study  
189 characteristics (primary author, year published, country, funding source, setting, and study  
190 population); participant inclusion and exclusion criteria; descriptions of intervention and  
191 comparator (oxygen therapy or NIV settings, adjustment parameters, and follow-up duration);

HFNO for hospitalized patients: a systematic review protocol

Date: 10/15/19

192 participant demographics (age, race/ethnicity, gender, comorbidities, and baseline physiologic  
193 parameters such as SpO<sub>2</sub>, respiratory rate, PaO<sub>2</sub>/FiO<sub>2</sub> ratio, pH, PaO<sub>2</sub>, and PCO<sub>2</sub>); and outcome  
194 data (patient-centered outcomes and intermediate outcomes). The data extraction form with the  
195 full list of information that will be extracted is provided in Appendix B. Data extraction will be  
196 stratified by setting; depending on data availability, we will also stratify data by comparator and  
197 by diagnosis or underlying disease.

198

### 199 **Data synthesis and analysis**

200 We will examine the clinical and methodological heterogeneity to determine  
201 appropriateness of quantitative synthesis. Analyses will be conducted by a systematic review  
202 methodologist. We will use Comprehensive Meta Analysis V.3 or R for pooled analyses. We will  
203 calculate risk ratios and Peto odds ratios (for rare events) and corresponding 95% confidence  
204 intervals for categorical outcomes. Mean and standardized mean difference will be calculated  
205 for continuous outcomes. Heterogeneity will be assessed by using the I<sup>2</sup> test. An I<sup>2</sup> statistic of 75  
206 or greater may indicate substantial heterogeneity. If heterogeneity exists, we will conduct  
207 sensitivity analyses to explore potential causes of heterogeneity. We will pool studies with  
208 clinically homogeneous (population, intervention, setting, outcome measures) studies with  
209 sufficient outcomes information. We will also pool data from studies deemed of low to moderate  
210 risk of bias (ROB). We will extract data from high ROB studies and include them in sensitivity  
211 analyses. If quantitative synthesis is not appropriate, findings will be summarized narratively.

212

### 213 **Assessment of bias in individual studies**

214 We will assess the risk of bias using a modification of the Cochrane guidance for  
215 randomized trials (19). Components of risk of bias assessment will include sequence  
216 generation, allocation concealment, blinding, attrition, and appropriateness of analytic methods.  
217 One reviewer will conduct risk of bias assessments at the study level and will be verified by a

HFNO for hospitalized patients: a systematic review protocol

Date: 10/15/19

218 second reviewer. Disagreements will be resolved through discussion and evaluation by a third  
219 reviewer. If appropriate, we may conduct sensitivity analyses excluding high risk of bias studies.

220 We will attempt to reduce the risk of publication bias by doing a comprehensive search  
221 across multiple data bases and with input from ACP-CGC and TEP members. We do not  
222 anticipate that there will be sufficient studies by population, intervention, and outcome to  
223 conduct funnel plots assessing for publication bias across studies. We will look at protocol  
224 papers, where available, to assess whether outcomes were pre-specified and whether all  
225 outcomes are reported.

226

### 227 **Assessment of the certainty of the body of evidence**

228 We will use the Grading of Recommendations, Assessment, Development, and  
229 Evaluation (GRADE) methodology to rate overall certainty of evidence for the critical outcomes  
230 identified by the ACP as high, moderate, low, or very low (20, 21).

231

### 232 **Patient and public involvement**

233 The list of patient-centered outcomes that will be evaluated in this systematic evidence  
234 review was developed and rated as critical or important with input from nonphysician public  
235 representatives.

236

### 237 **Ethics and dissemination**

238 No ethical approval will be needed because we will be using data from previously  
239 published studies in which informed consent was obtained by the primary investigators. We will  
240 publish our results in a peer-reviewed journal.

241

### 242 **CONCLUSION**

HFNO for hospitalized patients: a systematic review protocol  
Date: 10/15/19

243 This systematic review will provide a comprehensive evaluation of the evidence  
244 regarding the comparative effectiveness and harms of HFNO compared to NIV or COT for the  
245 management of ARF in hospitalized adult patients to inform clinical practice and to identify  
246 research gaps in the management of acute respiratory failure in hospitalized adults. The results  
247 will inform the work of the ACP-CGC in their development of a clinical guideline related to use of  
248 HFNO in adult patients with ARF.

249  
250 **Author contributions:** TJW is the guarantor. AKB, AM, NG, BNM, TJW contributed to study  
251 design and the PROSPERO protocol. NG developed the search strategy and the risk of bias  
252 assessment strategy. BNM and NG developed the data extraction tables. AKB drafted the  
253 protocol manuscript. AKB and AM provided expertise on acute respiratory failure management.  
254 RM provided statistical expertise. All authors provided critical revisions and approved the final  
255 manuscript.

256  
257 **Support:** This review is funded by a contract with the American College of Physicians (ACP).  
258 The ACP-Clinical Guideline Committee (CGC) assisted in the development of key questions,  
259 study inclusion criteria, and outcome measures of interest but will not be involved in data  
260 collection, analysis, or manuscript preparation.

261  
262 **Acknowledgements:** The evidence review team would like to acknowledge the ACP-CGC, the  
263 public representatives, and the technical expert panel (TEP) members who have provided  
264 valuable feedback on the protocol development. The TEP members are: Charles Carpati, MD;  
265 Andrew Dunn, MD, MPH, SFHM, MACP; Matthew G. Drake, MD; and Robert C. Hyzy, MD.

266  
267 **Competing interests:** TJW is Chair of the ACP-CGC. He will be recused from voting on or  
268 authoring the ACP guidelines. All other authors have no conflict of interests to declare.

HFNO for hospitalized patients: a systematic review protocol  
Date: 10/15/19

1  
2  
3  
4  
5  
6  
7  
8  
9  
10  
11  
12  
13  
14  
15  
16  
17  
18  
19  
20  
21  
22  
23  
24  
25  
26  
27  
28  
29  
30  
31  
32  
33  
34  
35  
36  
37  
38  
39  
40  
41  
42  
43  
44  
45  
46  
47  
48  
49  
50  
51  
52  
53  
54  
55  
56  
57  
58  
59  
60

269  
270  
271  
272  
273

**Data statement:** Data sharing is not applicable as no datasets were generated and/or analyzed for this protocol paper.

For peer review only



HFNO for hospitalized patients: a systematic review protocol

Date: 10/15/19

## References

1. Roca O, Riera J, Torres F, et al. High-flow oxygen therapy in acute respiratory failure. *Respir Care* 2010; 55: 408-413.
2. Rittayamai N, Tscheikuna J, Rujiwit P. High-flow nasal cannula versus conventional oxygen therapy after endotracheal extubation: a randomized crossover physiologic study. *Respir Care* 2014; 59: 485-490.
3. Tiruvoipati R, Lewis D, Haji K, et al. High-flow nasal oxygen vs high-flow face mask: a randomized crossover trial in extubated patients. *J Crit Care* 2010; 25: 463-468.
4. Sztrymf B, Messika J, Mayot T, et al. Impact of high-flow nasal cannula oxygen therapy on intensive care unit patients with acute respiratory failure: a prospective observational study. *J Crit Care* 2012; 27: 324.e329-313.
5. Williams R, Rankin N, Smith T, et al. Relationship between the humidity and temperature of inspired gas and the function of the airway mucosa. *Crit Care Med* 1996; 24: 1920-1929.
6. Hasani A, Chapman TH, McCool D, et al. Domiciliary humidification improves lung mucociliary clearance in patients with bronchiectasis. *Chron Respir Dis* 2008; 5: 81-86.
7. Sztrymf B, Messika J, Bertrand F, et al. Beneficial effects of humidified high flow nasal oxygen in critical care patients: a prospective pilot study. *Intensive Care Med* 2011; 37: 1780-1786.
8. Lenglet H, Sztrymf B, Leroy C, B et al. Humidified high flow nasal oxygen during respiratory failure in the emergency department: feasibility and efficacy. *Respir Care* 2012; 57: 1873-1878.
9. Möller W, Feng S, Domanski U, et al. Nasal high flow reduces dead space. *J Appl Physiol* (1985); 2017. p. 191-197.
10. Ritchie JE, Williams AB, Gerard C, et al. Evaluation of a humidified nasal high-flow oxygen system, using oxygraphy, capnography and measurement of upper airway pressures. *Anaesth Intensive Care* 2011; 39: 1103-1110.
11. Sim MA, Dean P, Kinsella J, et al. Performance of oxygen delivery devices when the breathing pattern of respiratory failure is simulated. *Anaesthesia* 2008; 63: 938-940.
12. Parke RL, McGuinness SP. Pressures delivered by nasal high flow oxygen during all phases of the respiratory cycle. *Respir Care* 2013; 58: 1621-1624.
13. Parke RL, Eccleston ML, McGuinness SP. The effects of flow on airway pressure during nasal high-flow oxygen therapy. *Respir Care* 2011; 56: 1151-1155.
14. Groves N, Tobin A. High flow nasal oxygen generates positive airway pressure in adult volunteers. *Aust Crit Care* 2007; 20: 126-131.
15. Parke R, McGuinness S, Eccleston M. Nasal high-flow therapy delivers low level positive airway pressure. *Br J Anaesth* 2009; 103: 886-890.
16. Corley A, Caruana LR, Barnett AG, et al. Oxygen delivery through high-flow nasal cannulae increase end-expiratory lung volume and reduce respiratory rate in post-cardiac surgical patients. *Br J Anaesth* 2011; 107: 998-1004.
17. Qaseem A, Kansagara D, Lin JS, et al. The Development of Clinical Guidelines and Guidance Statements by the Clinical Guidelines Committee of the American College of Physicians: Update of Methods. *Annals of Internal Medicine* 2019; 170: 863-870.
18. Moher D, Liberati A, Tetzlaff J, et al. Preferred Reporting Items for Systematic Reviews and Meta-Analyses: The PRISMA Statement. *Annals of Internal Medicine* 2009; 151: 264-269.
19. Higgins JP, Altman DG, Gotzsche PC, J et al. The Cochrane Collaboration's tool for assessing risk of bias in randomised trials. *BMJ* 2011; 343: d5928.
20. GRADEpro GDT: GRADEpro Guideline Development Tool. Ontario, Canada: McMaster University and Evidence Prime, Inc; 2015.



HFNO for hospitalized patients: a systematic review protocol

Date: 10/15/19

1  
2  
3 324 21. Schönemann H, Brožek J, Guyatt G, et al. GRADE handbook for grading quality of evidence  
4 325 and strength of recommendations. The GRADE Working Group, 2013.  
5 326 <https://gdt.gradepro.org/app/handbook/handbook.html>. (accessed October 9, 2019)  
6 327  
7  
8  
9  
10  
11  
12  
13  
14  
15  
16  
17  
18  
19  
20  
21  
22  
23  
24  
25  
26  
27  
28  
29  
30  
31  
32  
33  
34  
35  
36  
37  
38  
39  
40  
41  
42  
43  
44  
45  
46  
47  
48  
49  
50  
51  
52  
53  
54  
55  
56  
57  
58  
59  
60

For peer review only

**Appendix A. MEDLINE® search strategy**

- 1 (high flow nasal adj2 (cannula\$ or oxygen\$ or therap\$ or insufflation\$)).mp.
- 2 high flow therapy.mp.
- 3 nasal high flow.mp.
- 4 high flow oxygen.mp.
- 5 (humidified high flow or humidified oxygen).mp.
- 6 (HFNC or HHFNC or HFNT or NHF or HFNO or HFOT or HFNOT).ti,ab.
- 7 (Vapotherm or Optiflow or "Comfort Flo").ti,ab.
- 8 or/1-7
- 9 remove duplicates from 8
- 10 (randomized controlled trial or controlled clinical trial).pt. or randomized.ab.
- 11 (random\$ adj (enroll\$ or assign\$ or allocat\$)).ti,ab.
- 12 ((randomi#ed or controlled or clinical) adj2 trial\$).ti,ab.
- 13 or/10-12
- 14 9 and 13
- 15 (meta-analy\$ or metaanaly\$ or meta analy\$).ti,ab.
- 16 exp Meta-Analysis/
- 17 (systematic adj2 (review\$ or overview\$)).ti,ab.
- 18 (rapid review or meta synthesis or metasyntesis or meta-synthesis or umbrella review or integrative review or data synthesis or review of reviews).ti,ab.
- 19 or/15-18
- 20 9 and 19
- 21 limit 14 to english language
- 22 limit 21 to yr="1995 -Current"
- 23 limit 22 to "all child (0 to 18 years)"
- 24 limit 23 to "all adult (19 plus years)"
- 25 22 not 23
- 26 24 or 25
- 27 limit 20 to english language
- 28 limit 27 to yr="2015 -Current"
- 29 limit 28 to "all child (0 to 18 years)"
- 30 limit 29 to "all adult (19 plus years)"
- 31 28 not 29
- 32 30 or 31

1  
2  
3  
4  
5  
6  
7  
8  
9  
10  
11  
12  
13  
14  
15  
16  
17  
18  
19  
20  
21  
22  
23  
24  
25  
26  
27  
28  
29  
30  
31  
32  
33  
34  
35  
36  
37  
38  
39  
40  
41  
42  
43  
44  
45  
46  
47

**Appendix B. Data extraction tables**

**Table 1. Study Characteristics**

| <b>Author, year</b><br><b>Country</b><br><b>Funding</b><br><b>Setting</b><br><b>Special population</b><br><b>Risk of Bias</b> | <b>Inclusion/Exclusion Criteria</b> | <b>Intervention (n)</b><br><b>Comparator (n)</b><br><b>Follow-up (primary outcome)</b> | <b>Demographics</b>                                                                                                                                                                                                                                                                                                                                                                               |
|-------------------------------------------------------------------------------------------------------------------------------|-------------------------------------|----------------------------------------------------------------------------------------|---------------------------------------------------------------------------------------------------------------------------------------------------------------------------------------------------------------------------------------------------------------------------------------------------------------------------------------------------------------------------------------------------|
|                                                                                                                               | Inclusion:<br><br>Exclusion:        | Intervention:<br><br>Comparator:<br><br>Follow-up:                                     | N=<br>Age (mean):<br>Race/ethnicity (%):<br>White:<br>Black:<br>Other:<br>Gender (% male):<br><br>Comorbidities (%):<br>Chronic Respiratory Failure:<br>COPD:<br>Congestive Heart Failure:<br><br>Comorbidity Index:<br><br>Baseline characteristics:<br>SpO <sub>2</sub> :<br>Respiratory Rate:<br>PaO <sub>2</sub> /FiO <sub>2</sub> ratio:<br>pH:<br>PaO <sub>2</sub> :<br>PaCO <sub>2</sub> : |
|                                                                                                                               |                                     |                                                                                        |                                                                                                                                                                                                                                                                                                                                                                                                   |

**Table 2. Risk of Bias Assessment for Included Studies**

| Author, Year | Random Sequence Generation | Allocation Concealment | Blinding of Participants/ Personnel | Blinding of Outcome Assessment | Incomplete Outcome Data | Selective Reporting | Overall Risk of Bias |
|--------------|----------------------------|------------------------|-------------------------------------|--------------------------------|-------------------------|---------------------|----------------------|
|              |                            |                        |                                     |                                |                         |                     |                      |
|              |                            |                        |                                     |                                |                         |                     |                      |
|              |                            |                        |                                     |                                |                         |                     |                      |
|              |                            |                        |                                     |                                |                         |                     |                      |

**Table 3. Treatment Characteristics**

| Author Year Setting Follow-up Comparator | Adherence to treatment—describe measure |         | Treatment Settings                               |                                                       |                                                  |                                                       | Treatment Weaning Criteria |         |
|------------------------------------------|-----------------------------------------|---------|--------------------------------------------------|-------------------------------------------------------|--------------------------------------------------|-------------------------------------------------------|----------------------------|---------|
|                                          | Intervention                            | Control | Protocol                                         |                                                       | Received                                         |                                                       | Intervention               | Control |
|                                          |                                         |         | Intervention                                     | Control                                               | Intervention                                     | Control                                               |                            |         |
|                                          |                                         |         | Flow Rate:<br>FiO2:<br>Temperature:<br>Duration: | Flow Rate:<br>FiO2:<br>Temperature:<br>:<br>Duration: | Flow Rate:<br>FiO2:<br>Temperature:<br>Duration: | Flow Rate:<br>FiO2:<br>Temperature:<br>:<br>Duration: |                            |         |
|                                          |                                         |         |                                                  |                                                       |                                                  |                                                       |                            |         |
|                                          |                                         |         |                                                  |                                                       |                                                  |                                                       |                            |         |

Table 4: Patient-Centered Outcomes, Part 1

| Author Year<br>Setting<br>Follow-up<br>Comparator | All-cause Mortality<br>% (n/N) |         | ICU Admissions and/or Transfers<br>% (n/N)<br>(mean # of days) |         |              |         | Length of Hospital Stay<br>(mean # of days) |         |
|---------------------------------------------------|--------------------------------|---------|----------------------------------------------------------------|---------|--------------|---------|---------------------------------------------|---------|
|                                                   | Intervention                   | Control | Intervention                                                   | Control | Intervention | Control | Intervention                                | Control |
|                                                   |                                |         |                                                                |         |              |         |                                             |         |
|                                                   |                                |         |                                                                |         |              |         |                                             |         |
|                                                   |                                |         |                                                                |         |              |         |                                             |         |
|                                                   |                                |         |                                                                |         |              |         |                                             |         |

Table 5: Patient-Centered Outcomes, Part 2

| Author Year<br>Setting<br>Follow-up<br>Comparator | Hospital-acquired<br>Pneumonia<br>% (n/N) |         | Intubation<br>% (n/N)<br>(mean # of days) |         |              |         | Patient Comfort (mean, SD)<br>– describe measure |         |
|---------------------------------------------------|-------------------------------------------|---------|-------------------------------------------|---------|--------------|---------|--------------------------------------------------|---------|
|                                                   | Intervention                              | Control | Intervention                              | Control | Intervention | Control | Intervention                                     | Control |
|                                                   |                                           |         |                                           |         |              |         |                                                  |         |
|                                                   |                                           |         |                                           |         |              |         |                                                  |         |
|                                                   |                                           |         |                                           |         |              |         |                                                  |         |
|                                                   |                                           |         |                                           |         |              |         |                                                  |         |

Table 6: Patient-Centered Outcomes, Part 3

| Author Year<br>Setting<br>Follow-up<br>Comparator | Discharge Disposition<br>% (n/N for each location) |         | Hospital Readmissions (30 day)<br>% (n/N) |         | Functional Independence (mean,<br>SD)—describe measure |         |
|---------------------------------------------------|----------------------------------------------------|---------|-------------------------------------------|---------|--------------------------------------------------------|---------|
|                                                   | Intervention                                       | Control | Intervention                              | Control | Intervention                                           | Control |
|                                                   |                                                    |         |                                           |         |                                                        |         |
|                                                   |                                                    |         |                                           |         |                                                        |         |
|                                                   |                                                    |         |                                           |         |                                                        |         |

Table 7: Patient-Centered Outcomes, Part 4

| Author Year<br>Setting<br>Follow-up<br>Comparator | Compromised Nutrition |         |                      |         | Gastric Dysfunction                        |         |                                                        |         |
|---------------------------------------------------|-----------------------|---------|----------------------|---------|--------------------------------------------|---------|--------------------------------------------------------|---------|
|                                                   | % (n/N)               |         | # days w/o nutrition |         | % (n/N) with placement of nasogastric tube |         | % (n/N) with nausea, vomiting, or abdominal distension |         |
|                                                   | Intervention          | Control | Intervention         | Control | Intervention                               | Control | Intervention                                           | Control |
|                                                   |                       |         |                      |         |                                            |         |                                                        |         |
|                                                   |                       |         |                      |         |                                            |         |                                                        |         |
|                                                   |                       |         |                      |         |                                            |         |                                                        |         |
|                                                   |                       |         |                      |         |                                            |         |                                                        |         |

Table 8: Patient-Centered Outcomes, Part 5

| Author Year<br>Setting<br>Follow-up<br>Comparator | Barotrauma<br>% (n/N) |         | Skin Breakdown or Pressure<br>Ulcers<br>% (n/N) |         | Delirium<br>% (n/N) |         |
|---------------------------------------------------|-----------------------|---------|-------------------------------------------------|---------|---------------------|---------|
|                                                   | Intervention          | Control | Intervention                                    | Control | Intervention        | Control |
|                                                   |                       |         |                                                 |         |                     |         |
|                                                   |                       |         |                                                 |         |                     |         |
|                                                   |                       |         |                                                 |         |                     |         |
|                                                   |                       |         |                                                 |         |                     |         |

**Table 9: Intermediate Outcomes, Part 1**

| Author Year<br>Setting<br>Follow-up<br>Comparator | Respiratory Rate<br>(mean, SD) |         | PaO <sub>2</sub> /FiO <sub>2</sub> ratio<br>(mean, SD) |         | SpO <sub>2</sub><br>(mean, SD) |         |
|---------------------------------------------------|--------------------------------|---------|--------------------------------------------------------|---------|--------------------------------|---------|
|                                                   | Intervention                   | Control | Intervention                                           | Control | Intervention                   | Control |
|                                                   |                                |         |                                                        |         |                                |         |
|                                                   |                                |         |                                                        |         |                                |         |
|                                                   |                                |         |                                                        |         |                                |         |
|                                                   |                                |         |                                                        |         |                                |         |

**Table 10: Intermediate Outcomes, Part 2**

| Author Year<br>Setting<br>Follow-up<br>Comparator | pH<br>(mean, SD) |         | PaO <sub>2</sub><br>(mean, SD) |         | PaCO <sub>2</sub><br>(mean, SD) |         |
|---------------------------------------------------|------------------|---------|--------------------------------|---------|---------------------------------|---------|
|                                                   | Intervention     | Control | Intervention                   | Control | Intervention                    | Control |
|                                                   |                  |         |                                |         |                                 |         |
|                                                   |                  |         |                                |         |                                 |         |
|                                                   |                  |         |                                |         |                                 |         |
|                                                   |                  |         |                                |         |                                 |         |

1  
2  
3  
4  
5  
6  
7  
8  
9  
10  
11  
12  
13  
14  
15  
16  
17  
18  
19  
20  
21  
22  
23  
24  
25  
26  
27  
28  
29  
30  
31  
32  
33  
34  
35  
36  
37  
38  
39  
40  
41  
42  
43  
44  
45  
46  
47

## PRISMA-P 2015 Checklist

This checklist has been adapted for use with systematic review protocol submissions to BioMed Central journals from Table 3 in Moher D et al: Preferred reporting items for systematic review and meta-analysis protocols (PRISMA-P) 2015 statement. *Systematic Reviews* 2015 4:1

An Editorial from the Editors-in-Chief of *Systematic Reviews* details why this checklist was adapted – Moher D, Stewart L & Shekelle P: Implementing PRISMA-P: recommendations for prospective authors. *Systematic Reviews* 2016 5:15

| Section/topic                     | #  | Checklist item                                                                                                                                                                                  | Information reported                |                          | Line number(s)                    |
|-----------------------------------|----|-------------------------------------------------------------------------------------------------------------------------------------------------------------------------------------------------|-------------------------------------|--------------------------|-----------------------------------|
|                                   |    |                                                                                                                                                                                                 | Yes                                 | No                       |                                   |
| <b>ADMINISTRATIVE INFORMATION</b> |    |                                                                                                                                                                                                 |                                     |                          |                                   |
| <b>Title</b>                      |    |                                                                                                                                                                                                 |                                     |                          |                                   |
| Identification                    | 1a | Identify the report as a protocol of a systematic review                                                                                                                                        | <input checked="" type="checkbox"/> | <input type="checkbox"/> | 4                                 |
| Update                            | 1b | If the protocol is for an update of a previous systematic review, identify as such                                                                                                              | <input type="checkbox"/>            | <input type="checkbox"/> | N/a                               |
| <b>Registration</b>               | 2  | If registered, provide the name of the registry (e.g., PROSPERO) and registration number in the Abstract                                                                                        | <input checked="" type="checkbox"/> | <input type="checkbox"/> | 71. Awaiting registration number. |
| <b>Authors</b>                    |    |                                                                                                                                                                                                 |                                     |                          |                                   |
| Contact                           | 3a | Provide name, institutional affiliation, and e-mail address of all protocol authors; provide physical mailing address of corresponding author                                                   | <input checked="" type="checkbox"/> | <input type="checkbox"/> | 25-31                             |
| Contributions                     | 3b | Describe contributions of protocol authors and identify the guarantor of the review                                                                                                             | <input checked="" type="checkbox"/> | <input type="checkbox"/> | 250-255                           |
| <b>Amendments</b>                 | 4  | If the protocol represents an amendment of a previously completed or published protocol, identify as such and list changes; otherwise, state plan for documenting important protocol amendments | <input type="checkbox"/>            | <input type="checkbox"/> | N/a                               |
| <b>Support</b>                    |    |                                                                                                                                                                                                 |                                     |                          |                                   |
| Sources                           | 5a | Indicate sources of financial or other support for the review                                                                                                                                   | <input checked="" type="checkbox"/> | <input type="checkbox"/> | 257-260                           |
| Sponsor                           | 5b | Provide name for the review funder and/or sponsor                                                                                                                                               | <input checked="" type="checkbox"/> | <input type="checkbox"/> | 257-260                           |
| Role of sponsor/funder            | 5c | Describe roles of funder(s), sponsor(s), and/or institution(s), if any, in developing the protocol                                                                                              | <input checked="" type="checkbox"/> | <input type="checkbox"/> | 257-260                           |
| <b>INTRODUCTION</b>               |    |                                                                                                                                                                                                 |                                     |                          |                                   |
| <b>Rationale</b>                  | 6  | Describe the rationale for the review in the context of what is already known                                                                                                                   | <input checked="" type="checkbox"/> | <input type="checkbox"/> | 92-107                            |



| Section/topic                             | #   | Checklist item                                                                                                                                                                                                                              | Information reported                |                          | Line number(s) |
|-------------------------------------------|-----|---------------------------------------------------------------------------------------------------------------------------------------------------------------------------------------------------------------------------------------------|-------------------------------------|--------------------------|----------------|
|                                           |     |                                                                                                                                                                                                                                             | Yes                                 | No                       |                |
| <b>Objectives</b>                         | 7   | Provide an explicit statement of the question(s) the review will address with reference to participants, interventions, comparators, and outcomes (PICO)                                                                                    | <input checked="" type="checkbox"/> | <input type="checkbox"/> | 110-117        |
| <b>METHODS</b>                            |     |                                                                                                                                                                                                                                             |                                     |                          |                |
| <b>Eligibility criteria</b>               | 8   | Specify the study characteristics (e.g., PICO, study design, setting, time frame) and report characteristics (e.g., years considered, language, publication status) to be used as criteria for eligibility for the review                   | <input checked="" type="checkbox"/> | <input type="checkbox"/> | 125-167        |
| <b>Information sources</b>                | 9   | Describe all intended information sources (e.g., electronic databases, contact with study authors, trial registers, or other grey literature sources) with planned dates of coverage                                                        | <input checked="" type="checkbox"/> | <input type="checkbox"/> | 169-174        |
| <b>Search strategy</b>                    | 10  | Present draft of search strategy to be used for at least one electronic database, including planned limits, such that it could be repeated                                                                                                  | <input checked="" type="checkbox"/> | <input type="checkbox"/> | 169-174        |
| <b>STUDY RECORDS</b>                      |     |                                                                                                                                                                                                                                             |                                     |                          |                |
| Data management                           | 11a | Describe the mechanism(s) that will be used to manage records and data throughout the review                                                                                                                                                | <input checked="" type="checkbox"/> | <input type="checkbox"/> | 184-197        |
| Selection process                         | 11b | State the process that will be used for selecting studies (e.g., two independent reviewers) through each phase of the review (i.e., screening, eligibility, and inclusion in meta-analysis)                                                 | <input checked="" type="checkbox"/> | <input type="checkbox"/> | 176-182        |
| Data collection process                   | 11c | Describe planned method of extracting data from reports (e.g., piloting forms, done independently, in duplicate), any processes for obtaining and confirming data from investigators                                                        | <input checked="" type="checkbox"/> | <input type="checkbox"/> | 184-197        |
| <b>Data items</b>                         | 12  | List and define all variables for which data will be sought (e.g., PICO items, funding sources), any pre-planned data assumptions and simplifications                                                                                       | <input checked="" type="checkbox"/> | <input type="checkbox"/> | 184-197        |
| <b>Outcomes and prioritization</b>        | 13  | List and define all outcomes for which data will be sought, including prioritization of main and additional outcomes, with rationale                                                                                                        | <input checked="" type="checkbox"/> | <input type="checkbox"/> | 142-154        |
| <b>Risk of bias in individual studies</b> | 14  | Describe anticipated methods for assessing risk of bias of individual studies, including whether this will be done at the outcome or study level, or both; state how this information will be used in data synthesis                        | <input checked="" type="checkbox"/> | <input type="checkbox"/> | 213-225        |
| <b>DATA</b>                               |     |                                                                                                                                                                                                                                             |                                     |                          |                |
| <b>Synthesis</b>                          | 15a | Describe criteria under which study data will be quantitatively synthesized                                                                                                                                                                 | <input checked="" type="checkbox"/> | <input type="checkbox"/> | 199-211        |
|                                           | 15b | If data are appropriate for quantitative synthesis, describe planned summary measures, methods of handling data, and methods of combining data from studies, including any planned exploration of consistency (e.g., $I^2$ , Kendall's tau) | <input checked="" type="checkbox"/> | <input type="checkbox"/> | 199-211        |

| Section/topic                            | #   | Checklist item                                                                                                              | Information reported                |                          | Line number(s) |
|------------------------------------------|-----|-----------------------------------------------------------------------------------------------------------------------------|-------------------------------------|--------------------------|----------------|
|                                          |     |                                                                                                                             | Yes                                 | No                       |                |
|                                          | 15c | Describe any proposed additional analyses (e.g., sensitivity or subgroup analyses, meta-regression)                         | <input checked="" type="checkbox"/> | <input type="checkbox"/> | 199-211        |
|                                          | 15d | If quantitative synthesis is not appropriate, describe the type of summary planned                                          | <input checked="" type="checkbox"/> | <input type="checkbox"/> | 211            |
| <b>Meta-bias(es)</b>                     | 16  | Specify any planned assessment of meta-bias(es) (e.g., publication bias across studies, selective reporting within studies) | <input checked="" type="checkbox"/> | <input type="checkbox"/> | 220-225        |
| <b>Confidence in cumulative evidence</b> | 17  | Describe how the strength of the body of evidence will be assessed (e.g., GRADE)                                            | <input checked="" type="checkbox"/> | <input type="checkbox"/> | 227-230        |

# BMJ Open

## Effectiveness and harms of high-flow nasal oxygen (HFNO) for acute respiratory failure: a systematic review protocol

|                                 |                                                                                                                                                                                                                                                                                                                                                                                                                                                                                                                                                                                                                                                                                                                                                    |
|---------------------------------|----------------------------------------------------------------------------------------------------------------------------------------------------------------------------------------------------------------------------------------------------------------------------------------------------------------------------------------------------------------------------------------------------------------------------------------------------------------------------------------------------------------------------------------------------------------------------------------------------------------------------------------------------------------------------------------------------------------------------------------------------|
| Journal:                        | <i>BMJ Open</i>                                                                                                                                                                                                                                                                                                                                                                                                                                                                                                                                                                                                                                                                                                                                    |
| Manuscript ID                   | bmjopen-2019-034956.R1                                                                                                                                                                                                                                                                                                                                                                                                                                                                                                                                                                                                                                                                                                                             |
| Article Type:                   | Protocol                                                                                                                                                                                                                                                                                                                                                                                                                                                                                                                                                                                                                                                                                                                                           |
| Date Submitted by the Author:   | 27-Nov-2019                                                                                                                                                                                                                                                                                                                                                                                                                                                                                                                                                                                                                                                                                                                                        |
| Complete List of Authors:       | Baldomero, Arianne; Minneapolis VA Health Care System; University of Minnesota, Pulmonary, Allergy, Critical Care, and Sleep Medicine<br>Melzer, Anne; Minneapolis VA Health Care System; University of Minnesota, Pulmonary, Allergy, Critical Care, and Sleep Medicine<br>Greer, Nancy; Minneapolis VA Health Care System, Center for Care Delivery and Outcomes Research<br>Majeski, Brittany; Minneapolis VA Health Care System, Center for Care Delivery and Outcomes Research<br>Macdonald, Roderick; Minneapolis VA Health Care System, Center for Care Delivery and Outcomes Research<br>Wilt, Timothy; Minneapolis VA Health Care System, Center for Care Delivery and Outcomes Research; University of Minnesota, Department of Medicine |
| <b>Primary Subject Heading</b>: | General practice / Family practice                                                                                                                                                                                                                                                                                                                                                                                                                                                                                                                                                                                                                                                                                                                 |
| Secondary Subject Heading:      | Respiratory medicine, Intensive care, Evidence based practice                                                                                                                                                                                                                                                                                                                                                                                                                                                                                                                                                                                                                                                                                      |
| Keywords:                       | RESPIRATORY MEDICINE (see Thoracic Medicine), INTERNAL MEDICINE, INTENSIVE & CRITICAL CARE, Adult thoracic medicine < THORACIC MEDICINE, GENERAL MEDICINE (see Internal Medicine), Adult intensive & critical care < INTENSIVE & CRITICAL CARE                                                                                                                                                                                                                                                                                                                                                                                                                                                                                                     |
|                                 |                                                                                                                                                                                                                                                                                                                                                                                                                                                                                                                                                                                                                                                                                                                                                    |

SCHOLARONE™  
Manuscripts

**PROTOCOL:****Effectiveness and harms of high-flow nasal oxygen (HFNO)  
for acute respiratory failure: a systematic review protocol****Authors' full names:**

Arianne K. Baldomero, MD, MS<sup>1,2</sup>

Anne Melzer, MD, MS<sup>1,2</sup>

Nancy Greer, PhD<sup>3</sup>

Brittany N. Majeski, BA<sup>3</sup>

Roderick MacDonald, MS<sup>3</sup>

Timothy J. Wilt, MD, MPH<sup>3,4</sup>

**Authors' affiliation(s):**

1: Division of Pulmonary, Allergy, Critical Care, and Sleep Medicine, Department of Medicine, Minneapolis Veterans Affairs Healthcare System, Minneapolis, MN, USA

2: Division of Pulmonary, Allergy, Critical Care, and Sleep Medicine, Department of Medicine, University of Minnesota, Minneapolis, MN, USA

3: Center for Care Delivery and Outcomes Research, Minneapolis Veterans Affairs Healthcare System, Minneapolis, MN, USA

4: Department of Medicine, University of Minnesota, Minneapolis, MN, USA

1  
2  
3 25 **Corresponding author full contact details:**  
4

5 26 Name: Arianne Baldomero, MD, MS  
6

7 27 Address: 1 Veterans Drive,  
8

9 28 Post code: Pulmonary 111N  
10

11 29 City: Minneapolis, MN  
12

13 30 Country: USA  
14

15 31 Email: baldo004@umn.edu  
16  
17  
18 32  
19 33  
20 34  
21 35  
22  
23  
24  
25  
26  
27  
28  
29  
30  
31  
32  
33  
34  
35  
36  
37  
38  
39  
40  
41  
42  
43  
44  
45  
46  
47  
48  
49  
50  
51  
52  
53  
54  
55  
56  
57  
58  
59  
60

## 36 **ABSTRACT**

### 38 **Introduction**

39 High-flow nasal oxygen (HFNO) use in adults hospitalized with acute respiratory failure  
40 (ARF) is increasing. However, evidence to support widespread use of HFNO compared to  
41 noninvasive ventilation (NIV) and conventional oxygen therapy (COT) is unclear. This protocol  
42 describes the methods for a systematic evidence review regarding the comparative  
43 effectiveness and harms of HFNO compared to NIV or COT for the management of ARF in  
44 hospitalized adult patients.

### 46 **Methods and analysis**

47 We will search MEDLINE®, Embase, CINAHL, and Cochrane Library for randomized-  
48 controlled trials (RCTs) of adult patients hospitalized with ARF or who developed ARF while  
49 hospitalized. ARF will be defined as  $SpO_2 < 90\%$ ,  $PaO_2:FiO_2$  ratio  $\leq 300$ ,  $PaO_2 \leq 60$  mmHg, or  
50  $PaCO_2 \geq 45$  mmHg. The intervention is HFNO (humidified oxygen, flow rate  $\geq 20$  L/min)  
51 compared separately to NIV or COT. The critical outcomes are: all-cause mortality, hospital-  
52 acquired pneumonia, intubation/reintubation (days of intubation), intensive care unit (ICU)  
53 admission/transfers, patient comfort, and hospital length of stay. The important outcomes are:  
54 delirium, 30-day hospital readmissions, barotrauma, compromised nutrition (enteral or  
55 parenteral nutrition), gastric dysfunction, functional independence at discharge, and skin  
56 breakdown or pressure ulcers. We will calculate risk ratios and Peto odds ratios (for rare events)  
57 and corresponding 95% confidence intervals for categorical outcomes. Mean and standardized  
58 mean difference will be calculated for continuous outcomes. Where possible and appropriate,  
59 meta-analysis will be performed for each outcome.

### 61 **Conclusion**

1  
2  
3 62 This systematic review will provide a comprehensive evaluation of the evidence  
4  
5 63 regarding the comparative effectiveness and harms of HFNO compared to NIV or COT for the  
6  
7 64 management of ARF in hospitalized adult patients to inform clinical practice and to identify  
8  
9 65 research gaps in the management of ARF in hospitalized adults. The results will inform the work  
10  
11 66 of the ACP-CGC in their development of a clinical guideline related to use of HFNO in adult  
12  
13 67 patients with ARF.  
14  
15

16 68

### 17 69 **Ethics and dissemination**

19  
20 70 No ethical approval will be needed because we will be using data from previously  
21  
22 71 published studies in which informed consent was obtained by the primary investigators. We will  
23  
24 72 publish our results in a peer-reviewed journal.  
25

26 73

27  
28 74 **PROSPERO registration:** CRD42019146691  
29

30 75

31  
32 76 **MeSH keywords:** systematic review; oxygen inhalation therapy; respiratory failure; respiratory  
33  
34 77 tract diseases; positive-pressure respiration; high-flow nasal oxygen  
35

36 78

37  
38  
39 79 **Word count:** 1,969  
40

41 80

### 42 81 **Strengths and limitations of this study:**

- 43  
44  
45 82
  - 46 83 ■ We will compare high-flow nasal oxygen (HFNO) to both noninvasive ventilation and
  - 47 84 ■ We will evaluate the efficacy and harms of HFNO in a wide-range of clinical conditions
  - 48 85 (e.g. chronic obstructive pulmonary disease, cardiogenic pulmonary edema,
  - 49 86 immunosuppressed, post-surgery, post-extubation, etc.) and multiple clinical settings

1  
2  
3 87 (emergency department, intensive care unit, intermediate/step-down unit, and hospital  
4  
5 88 ward).

6  
7 89 ▪ The comprehensive list of clinically-relevant outcomes that will be evaluated in this  
8  
9 90 systematic evidence review was developed with input from physician and nonphysician  
10  
11 91 public representatives.

12  
13 92 ▪ This systematic evidence review of HFNO will be limited to studies evaluating patients  
14  
15 93 who meet criteria for acute respiratory failure.

16  
17 94 ▪ We will exclude studies that evaluated HFNO for oxygenation support before  
18  
19 95 (preoxygenation) and during intubation.  
20  
21

22 96  
23  
24  
25  
26  
27  
28  
29  
30  
31  
32  
33  
34  
35  
36  
37  
38  
39  
40  
41  
42  
43  
44  
45  
46  
47  
48  
49  
50  
51  
52  
53  
54  
55  
56  
57  
58  
59  
60



## 97 INTRODUCTION

98 High-flow nasal oxygen (HFNO) therapy is a mode of noninvasive oxygen support that  
99 has been used in neonatal and pediatric settings for over a decade. In recent years, HFNO use  
100 in adults hospitalized with acute respiratory failure (ARF) has been increasing. HFNO delivers  
101 warmed, humidified oxygen with fraction of inspired oxygen (FiO<sub>2</sub>) up to 1.0 and maximum flow  
102 rate of 60 L/min. Several potential physiologic advantages of HFNO over noninvasive ventilation  
103 (NIV) and conventional oxygen therapy (COT) have been proposed (1, 2). These include patient  
104 comfort (3-5), improved oxygenation and ventilation (6, 7), clearance of airway secretions (8, 9),  
105 and reduced work of breathing (4, 10, 11). These theoretical benefits are attributed to HFNO  
106 delivery through small, pliable nasal cannula, washout of anatomic dead space (12), high  
107 oxygen flow rates (13, 14), generation of low level positive-end expiratory pressure (PEEP) (15-  
108 19), and heated humidification.

109 Given the increasing use of HFNO and the lack of robust evidence to support its  
110 widespread use in adult patients with ARF, the Minnesota Evidence Synthesis and  
111 Dissemination Center was commissioned by the American College of Physicians (ACP) to  
112 systematically review the evidence regarding the comparative effectiveness and harms of  
113 HFNO compared to NIV or COT for the management of ARF in hospitalized adult patients.  
114 Compared to existing reviews in this area, this systematic evidence review will include a broader  
115 scope that will compare HFNO to both NIV and COT, assess a wider range of clinical conditions  
116 in multiple clinical settings, and evaluate a more comprehensive list of key clinical outcomes.  
117 Furthermore, an updated review will include evidence from recently published clinical trials. This  
118 systematic review will be used by the ACP-Clinical Guidelines Committee (ACP-CGC) to  
119 develop a clinical practice guideline for the use of HFNO in acute respiratory failure. With input  
120 from the ACP-Clinical Guidelines Committee (ACP-CGC) (20) and a technical expert panel  
121 (TEP), we developed the following key questions (KQ):

1  
2  
3 122 KQ 1. What is the comparative effectiveness of HFNO versus NIV or COT for hospitalized  
4  
5 123 patients with ARF? Does comparative effectiveness of HFNO vary by patient  
6  
7 124 characteristics, disease/diagnosis characteristics, protocol/device settings, or location of  
8  
9 125 administration?  
10

11 126  
12  
13 127 KQ 2. What are the harms of HFNO versus NIV or COT for hospitalized patients with  
14  
15 128 ARF? Do harms vary by patient characteristics, disease/diagnosis, protocol/device  
16  
17 129 settings, or location of administration?  
18  
19

20 130

## 21 131 **METHODS**

22 132 In accordance with the guidelines, our systematic review protocol was registered with  
23  
24 133 the International Prospective Register of Systematic Reviews (PROSPERO) on August 8, 2019.  
25  
26 134 We will report our findings according to the Preferred Reporting Items for Systematic Reviews  
27  
28 135 and Meta-Analyses (PRISMA) 2009 statement (21).  
29  
30

31 136

### 32 137 **Eligibility criteria**

33  
34  
35 138 All studies that will be included in this systematic review will be selected in accordance  
36  
37 139 with the PICOTS (Population, Intervention, Comparison, Outcomes, Timing, Study Design)  
38  
39 140 framework (Appendix A). A study will be included if at least 75% of the participants meet the  
40  
41 141 inclusion criteria.  
42  
43

44 142

### 45 143 **Population**

46  
47 144 We will include all adult patients (age  $\geq 18$  years) with ARF at the time of study enrollment.  
48  
49 145 A study will be included if at least one criterion for ARF is met:  $SpO_2 < 90\%$ ,  $PaO_2:FIO_2$   
50  
51 146 ratio  $\leq 300$ ,  $PaO_2 \leq 60$  mmHg, or  $PaCO_2 \geq 45$  mmHg.  
52  
53

54 147  
55  
56  
57  
58  
59  
60

1  
2  
3 148 **Intervention**

4  
5 149 The intervention of interest is HFNO, defined as humidified oxygen with flow rates  $\geq 20$   
6  
7 150 L/min.  
8

9 151

10  
11 152 **Comparators**

12  
13 153 We will compare HFNO vs. NIV (continuous or bilevel positive airway pressure ventilation  
14  
15 154 [CPAP or BiPAP®]) and HFNO vs. COT (e.g. oxygen delivered through nasal cannula,  
16  
17 155 simple face mask, air-entrainment mask, partial rebreathing mask, non-rebreather mask,  
18  
19 156 etc.).  
20  
21

22 157

23  
24 158 **Outcome measures**

25  
26 159 We will examine several patient-related outcomes and intermediate outcomes. With input  
27  
28 160 from the ACP-CGC that included physician and nonphysician public representatives,  
29  
30 161 outcomes were identified as critical or important. The critical outcomes are: all-cause  
31  
32 162 mortality (in-hospital and the longest available through 90 days), hospital-acquired  
33  
34 163 pneumonia, intubation/reintubation (days of intubation), intensive care unit (ICU)  
35  
36 164 admission/transfers, patient comfort, and hospital length of stay. The important outcomes  
37  
38 165 are: delirium, 30-day hospital readmissions, barotrauma (pneumothorax,  
39  
40 166 pneumomediastinum, pneumoperitoneum, or ventilator-induced lung injury), compromised  
41  
42 167 nutrition (enteral or parenteral nutrition), gastric dysfunction (placement of nasogastric  
43  
44 168 tube, abdominal distension, nausea, or vomiting), functional independence at discharge,  
45  
46 169 discharge disposition (home, assisted-living facility, nursing home, or long-term care  
47  
48 170 hospital), and skin breakdown or pressure ulcers. Intermediate outcomes are: respiratory  
49  
50 171 rate,  $\text{PaO}_2/\text{FiO}_2$  ratio,  $\text{SpO}_2$ , pH,  $\text{PaO}_2$ ,  $\text{PCO}_2$ , treatment escalation, and device  
51  
52 172 intolerance. If multiple points are reported, we will categorize these as “short” (first time  
53  
54  
55  
56  
57  
58  
59  
60

1  
2  
3 173 point) and “longer” (last time point) term outcomes. We will also explore analyses based  
4  
5 174 on commonly reported time points.  
6

7 175

8  
9 176 ***Timing***

10  
11 177 We will include patients hospitalized for ARF or who developed ARF while hospitalized,  
12  
13 178 including patients with ARF post-extubation or post-surgery. We will exclude studies  
14  
15 179 evaluating HFNO for oxygenation support before (preoxygenation) and during intubation.  
16  
17 180

18  
19  
20 181 ***Setting***

21  
22 182 We will include studies that randomized patients in the hospital (including hospital wards,  
23  
24 183 intermediate/step-down units, and intensive care units) and emergency department.  
25

26 184

27  
28 185 ***Study design***

29  
30 186 Randomized controlled trials (RCTs) including crossover RCTs and cluster RCTs with full-  
31  
32 187 text reports in English will be included. We will exclude non-randomized trials and  
33  
34 188 observational studies.  
35

36 189

37  
38  
39 190 **Data sources and search strategy**

40  
41 191 We will search MEDLINE®, Embase, CINAHL, and Cochrane Library from January 2000  
42  
43 192 to August 2019. HFNO was not widely used in adults prior to 2000.” The literature search will be  
44  
45 193 updated prior to preparation of the final report. The search strategy for the MEDLINE® search is  
46  
47 194 provided in Appendix B. We will search references of the primary studies and published  
48  
49 195 systematic reviews for relevant studies. We will also search ClinicalTrials.gov for recently  
50  
51 196 completed or ongoing clinical trials.  
52

53 197

54  
55  
56 198 **Study selection process**

1  
2  
3 199 We will conduct the study selection in two stages: stage one is abstract triage and stage  
4  
5 200 two is full-text triage. All studies in stage one and stage two of the study selection process will  
6  
7 201 be reviewed independently by two members of the review team. Abstracts included by one  
8  
9 202 reviewer will move on to full-text review. At the full text review stage, both reviewers must agree  
10  
11 203 on study inclusion or exclusion. Disagreements will be resolved through discussion and  
12  
13 204 evaluation by a third reviewer, if needed.  
14  
15  
16 205

### 17 18 206 **Data extraction and management**

19  
20 207 Data extraction forms will be piloted by three members of the review team. Final data  
21  
22 208 extraction will be conducted by one investigator with verification by a second team member.  
23  
24 209 Disagreements in data extraction will be resolved by consensus that includes the senior  
25  
26 210 investigator (TJW). Data that will be extracted include information related to study  
27  
28 211 characteristics (primary author, year published, country, funding source, setting, and study  
29  
30 212 population); participant inclusion and exclusion criteria; descriptions of intervention and  
31  
32 213 comparator (oxygen therapy or NIV settings, adjustment parameters, and follow-up duration);  
33  
34 214 participant demographics (age, race/ethnicity, gender, comorbidities, and baseline physiologic  
35  
36 215 parameters such as SpO<sub>2</sub>, respiratory rate, PaO<sub>2</sub>/FiO<sub>2</sub> ratio, pH, PaO<sub>2</sub>, and PCO<sub>2</sub>); and outcome  
37  
38 216 data (patient-centered outcomes and intermediate outcomes). The data extraction form with the  
39  
40 217 full list of information that will be extracted is provided in Appendix C. Data will be extracted  
41  
42 218 similarly for all eligible studies and then subgroup analyses will be performed.  
43  
44  
45 219

### 46 47 220 **Data synthesis and analysis**

48  
49 221 We will examine the clinical and methodological heterogeneity to determine  
50  
51 222 appropriateness of quantitative synthesis. Cluster RCTs will be evaluated for statistical  
52  
53 223 measures that adjust for clustering. Analyses will be conducted by a systematic review  
54  
55 224 methodologist. We will use Comprehensive Meta Analysis V.3 or R for pooled analyses. We will  
56  
57  
58  
59  
60

1  
2  
3 225 calculate risk ratios and Peto odds ratios (for rare events) and corresponding 95% confidence  
4  
5 226 intervals for categorical outcomes. Mean and standardized mean difference will be calculated  
6  
7 227 for continuous outcomes. Heterogeneity will be assessed by using the  $I^2$  statistic, Chi-squared  
8  
9 228 test, and visual inspection of the forest plots. An  $I^2$  statistic of 75 or greater may indicate  
10  
11 229 substantial heterogeneity. If heterogeneity exists, we will conduct sensitivity analyses to explore  
12  
13 230 potential causes of heterogeneity. We will pool clinically homogeneous (population, intervention,  
14  
15 231 setting, outcome measures) studies with sufficient outcomes information. We will also pool data  
16  
17 232 from studies deemed of low to moderate risk of bias (ROB). We will extract data from high ROB  
18  
19 233 studies and include them in sensitivity analyses. If quantitative synthesis is not appropriate,  
20  
21 234 findings will be summarized narratively.  
22  
23  
24 235

### 26 236 **Subgroup analysis**

28 237 If sufficient data allows, we plan to perform analysis on the following subgroups of  
29  
30 238 interest: (1) noninvasive ventilator (NIV) vs. conventional oxygen therapy (COT); (2) emergency  
31  
32 239 department (ED), ICU, hospital ward/step down, or mixed settings; (3) chronic obstructive  
33  
34 240 pulmonary disease (COPD), cardiogenic pulmonary edema/acute decompensated heart failure,  
35  
36 241 pneumonia, obese, post-extubation, post-surgical, immunocompromised, (4) hypoxic,  
37  
38 242 hypercapnic, and mixed (hypoxic or hypercapnic) respiratory failure; (5) treatment duration <6  
39  
40 243 vs. ≥6 hours; and (6) lower (≤30 L/min) vs. higher (>30 L/min) flow settings.  
41  
42

43 244 We hypothesize that: (1) HFNO is more beneficial than COT, but is as effective, though  
44  
45 245 less comfortable, than NIV; (2) the efficacy of HFNO is likely the same as NIV, but better than  
46  
47 246 COT, in different settings; (3) HFNO is as effective as NIV in COPD, pneumonia, post-  
48  
49 247 extubation, and post-surgical patients; (4) HFNO is less effective than NIV in cardiogenic  
50  
51 248 pulmonary edema and obesity due to lower level of PEEP; (5) HFNO is more effective than  
52  
53 249 COT in most disease states; (6) HFNO is more effective and less harmful than NIV in hypoxic  
54  
55 250 respiratory failure, but is less effective in hypercapnic and mixed hypoxic and hypercapnic  
56  
57  
58  
59  
60

1  
2  
3 251 respiratory failure; and (7) higher flow (>30 L/min) is more effective, but is less comfortable, than  
4  
5 252 lower flow ( $\leq$ 30 L/min) settings. If subgroup analyses are performed, we will assess subgroup  
6  
7 253 effects with an  $I^2$  statistic for subgroup differences. The  $I^2$  statistic delineates the percentage of  
8  
9 254 variability in the estimates of effect between the different subgroups that is due to real subgroup  
10  
11 255 differences (as opposed to sampling error).  
12

13  
14 256

### 15 16 257 **Assessment of bias in individual studies**

17  
18 258 We will assess the risk of bias using a modification of the Cochrane guidance for  
19  
20 259 randomized trials (22). Individual elements will be rated low, unclear, or high risk of bias. Our  
21  
22 260 modification of the tool is to identify overall study risk of bias as low, moderate, or high. A study  
23  
24 261 with unclear elements will be considered moderate risk of bias. Components of risk of bias  
25  
26 262 assessment will include sequence generation, allocation concealment, blinding, attrition, and  
27  
28 263 appropriateness of analytic methods. One reviewer will conduct risk of bias assessments at the  
29  
30 264 study level and will be verified by a second reviewer. Disagreements will be resolved through  
31  
32 265 discussion and evaluation by a third reviewer. If appropriate, we may conduct sensitivity  
33  
34 266 analyses excluding high risk of bias studies.  
35

36  
37 267 We will attempt to reduce the risk of publication bias by doing a comprehensive search  
38  
39 268 across multiple data bases and with input from ACP-CGC and TEP members. We will conduct  
40  
41 269 funnel plot analysis to assess for publication bias across studies if sufficient studies are found.  
42  
43 270 We will look at protocol papers, where available, to assess whether outcomes were pre-  
44  
45 271 specified and whether all outcomes are reported.  
46

47  
48 272

### 49 50 273 **Assessment of the certainty of the body of evidence**

51  
52 274 We will use the Grading of Recommendations, Assessment, Development, and  
53  
54 275 Evaluation (GRADE) methodology to rate overall certainty of evidence for the critical outcomes  
55  
56 276 identified by the ACP as high, moderate, low, or very low (23, 24).  
57  
58  
59  
60

1  
2  
3 277  
45 278 **Patient and public involvement**

7 279 The list of patient-centered outcomes that will be evaluated in this systematic evidence  
8 review was developed and rated as critical or important with input from nonphysician public  
9 representatives.  
10 280  
11 281  
12 282

13  
14  
15 283 **Ethics and dissemination**

17 284 No ethical approval will be needed because we will be using data from previously  
18 published studies in which informed consent was obtained by the primary investigators. We will  
19 publish our results in a peer-reviewed journal.  
20 285  
21 286  
22 287

23  
24  
25  
26 288 **CONCLUSION**

27 289 This systematic review will provide a comprehensive evaluation of the evidence  
28 regarding the comparative effectiveness and harms of HFNO compared to NIV or COT for the  
29 management of ARF in hospitalized adult patients to inform clinical practice and to identify  
30 research gaps in the management of acute respiratory failure in hospitalized adults. The results  
31 will inform the work of the ACP-CGC in their development of a clinical guideline related to use of  
32 HFNO in adult patients with ARF.  
33 290  
34 291  
35 292  
36 293  
37 294  
38 295

39 296 **Author contributions:** TJW is the guarantor. AKB, AM, NG, BNM, TJW contributed to study  
40 design and the PROSPERO protocol. NG developed the search strategy and the risk of bias  
41 assessment strategy. BNM and NG developed the data extraction tables. AKB drafted the  
42 protocol manuscript. AKB and AM provided expertise on acute respiratory failure management.  
43 297  
44 298  
45 299  
46 300  
47 301  
48 302  
49 303  
50 304  
51 305  
52 306  
53 307  
54 308  
55 309  
56 310  
57 311  
58 312  
59 313  
60 314



1  
2  
3 303 **Support:** This review is funded by a contract with the American College of Physicians (ACP).  
4  
5 304 The ACP-Clinical Guideline Committee (CGC) assisted in the development of key questions,  
6  
7 305 study inclusion criteria, and outcome measures of interest but will not be involved in data  
8  
9 306 collection, analysis, or manuscript preparation.  
10

11 307  
12  
13 308 **Acknowledgements:** The evidence review team would like to acknowledge the ACP-CGC, the  
14  
15 309 public representatives, and the technical expert panel (TEP) members who have provided  
16  
17 310 valuable feedback on the protocol development. The TEP members are: Charles Carpati, MD;  
18  
19 311 Andrew Dunn, MD, MPH, SFHM, MACP; Matthew G. Drake, MD; and Robert C. Hyzy, MD.  
20  
21

22 312  
23  
24 313 **Competing interests:** TJW is Chair of the ACP-CGC. He will be recused from voting on or  
25  
26 314 authoring the ACP guidelines. All other authors have no conflict of interests to declare.  
27  
28

29 315  
30  
31 316 **Data statement:** Data sharing is not applicable as no datasets were generated and/or analyzed  
32  
33 317 for this protocol paper.  
34

35 318  
36  
37 319  
38  
39  
40  
41  
42  
43  
44  
45  
46  
47  
48  
49  
50  
51  
52  
53  
54  
55  
56  
57  
58  
59  
60

## References

1. Spoletini G, Cortegiani A, Gregoretti C. Physiopathological rationale of using high-flow nasal therapy in the acute and chronic setting: A narrative review. *Trends in Anaesthesia and Critical Care* 2019; 26-27: 22-29.
2. Cortegiani A, Accurso G, Mercadante S, et al. High flow nasal therapy in perioperative medicine: from operating room to general ward. *BMC Anesthesiology* 2018; 18: 1-8.
3. Roca O, Riera J, Torres F, et al. High-flow oxygen therapy in acute respiratory failure. *Respir Care* 2010; 55: 408-413.
4. Rittayamai N, Tscheikuna J, Rujiwit P. High-flow nasal cannula versus conventional oxygen therapy after endotracheal extubation: a randomized crossover physiologic study. *Respir Care* 2014; 59: 485-490.
5. Cortegiani A, Crimi C, Noto A, et al. Effect of high-flow nasal therapy on dyspnea, comfort, and respiratory rate. *Crit Care*. England; 2019. p. 201.
6. Tiruvoipati R, Lewis D, Haji K, et al. High-flow nasal oxygen vs high-flow face mask: a randomized crossover trial in extubated patients. *J Crit Care* 2010; 25: 463-468.
7. Sztrymf B, Messika J, Mayot T, et al. Impact of high-flow nasal cannula oxygen therapy on intensive care unit patients with acute respiratory failure: a prospective observational study. *J Crit Care* 2012; 27: 324.e329-313.
8. Williams R, Rankin N, Smith T, et al. Relationship between the humidity and temperature of inspired gas and the function of the airway mucosa. *Crit Care Med* 1996; 24: 1920-1929.
9. Hasani A, Chapman TH, McCool D, et al. Domiciliary humidification improves lung mucociliary clearance in patients with bronchiectasis. *Chron Respir Dis* 2008; 5: 81-86.
10. Sztrymf B, Messika J, Bertrand F, et al. Beneficial effects of humidified high flow nasal oxygen in critical care patients: a prospective pilot study. *Intensive Care Med* 2011; 37: 1780-1786.
11. Lenglet H, Sztrymf B, Leroy C, et al. Humidified high flow nasal oxygen during respiratory failure in the emergency department: feasibility and efficacy. *Respir Care* 2012; 57: 1873-1878.
12. Möller W, Feng S, Domanski U, et al. Nasal high flow reduces dead space. *J Appl Physiol* (1985); 2017. p. 191-197.
13. Ritchie JE, Williams AB, Gerard C, et al. Evaluation of a humidified nasal high-flow oxygen system, using oxygraphy, capnography and measurement of upper airway pressures. *Anaesth Intensive Care* 2011; 39: 1103-1110.
14. Sim MA, Dean P, Kinsella J, et al. Performance of oxygen delivery devices when the breathing pattern of respiratory failure is simulated. *Anaesthesia* 2008; 63: 938-940.
15. Parke RL, McGuinness SP. Pressures delivered by nasal high flow oxygen during all phases of the respiratory cycle. *Respir Care* 2013; 58: 1621-1624.
16. Parke RL, Eccleston ML, McGuinness SP. The effects of flow on airway pressure during nasal high-flow oxygen therapy. *Respir Care* 2011; 56: 1151-1155.
17. Groves N, Tobin A. High flow nasal oxygen generates positive airway pressure in adult volunteers. *Aust Crit Care* 2007; 20: 126-131.
18. Parke R, McGuinness S, Eccleston M. Nasal high-flow therapy delivers low level positive airway pressure. *Br J Anaesth* 2009; 103: 886-890.
19. Corley A, Caruana LR, Barnett AG, et al. Oxygen delivery through high-flow nasal cannulae increase end-expiratory lung volume and reduce respiratory rate in post-cardiac surgical patients. *Br J Anaesth* 2011; 107: 998-1004.
20. Qaseem A, Kansagara D, Lin JS, et al. The Development of Clinical Guidelines and Guidance Statements by the Clinical Guidelines Committee of the American College of Physicians: Update of Methods. *Annals of Internal Medicine* 2019; 170: 863-870.

- 1  
2  
3 370 21. Moher D, Liberati A, Tetzlaff J, et al. Preferred Reporting Items for Systematic Reviews and  
4 371 Meta-Analyses: The PRISMA Statement. *Annals of Internal Medicine* 2009; 151: 264-  
5 372 269.
- 6 373 22. Higgins JP, Altman DG, Gotzsche PC, et al. The Cochrane Collaboration's tool for  
7 374 assessing risk of bias in randomised trials. *BMJ* 2011; 343: d5928.
- 8 375 23. GRADEpro GDT: GRADEpro Guideline Development Tool. Ontario, Canada: McMaster  
9 376 University and Evidence Prime, Inc; 2015.
- 10 377 24. Schünemann H, Brożek J, Guyatt G, et al. GRADE Handbook. 2019 [cited 2019 October 9,  
11 378 2019]. Available from: <https://gdt.grade.org/app/handbook/handbook.html>.  
12 379

13  
14  
15  
16  
17  
18  
19  
20  
21  
22  
23  
24  
25  
26  
27  
28  
29  
30  
31  
32  
33  
34  
35  
36  
37  
38  
39  
40  
41  
42  
43  
44  
45  
46  
47  
48  
49  
50  
51  
52  
53  
54  
55  
56  
57  
58  
59  
60

For peer review only

## Appendix A. Key Questions and PICOTS

### KEY QUESTIONS

1) What is the comparative effectiveness of high flow nasal oxygen versus noninvasive positive pressure ventilation (CPAP, BiPAP®) or conventional oxygen for hospitalized patients?

1a) Does comparative effectiveness of high flow nasal oxygen vary by patient characteristics, disease/diagnosis characteristics, protocol/device settings, or location of administration?

2) What are the harms of high flow nasal oxygen versus noninvasive positive pressure ventilation (CPAP, BiPAP®), invasive mechanical ventilation, or conventional oxygen for hospitalized patients?

2a) Do harms vary by patient characteristics, disease/diagnosis, protocol/device settings, or location of administration?

| PICOTS               |                                                                                                                                                                                                                                                                                                                                                                                                                                                                                                                                                                                                                                                                                                                                                                                                                                                       |
|----------------------|-------------------------------------------------------------------------------------------------------------------------------------------------------------------------------------------------------------------------------------------------------------------------------------------------------------------------------------------------------------------------------------------------------------------------------------------------------------------------------------------------------------------------------------------------------------------------------------------------------------------------------------------------------------------------------------------------------------------------------------------------------------------------------------------------------------------------------------------------------|
| <b>Population:</b>   | Hospitalized adult patients with acute respiratory failure (ARF). ARF defined as SpO <sub>2</sub> <90%, PaO <sub>2</sub> :FiO <sub>2</sub> ratio ≤300, PaO <sub>2</sub> ≤60 mmHg, or PaCO <sub>2</sub> ≥45 mmHg                                                                                                                                                                                                                                                                                                                                                                                                                                                                                                                                                                                                                                       |
| <b>Intervention:</b> | High flow nasal oxygen (humidified, ≥20 l/min)                                                                                                                                                                                                                                                                                                                                                                                                                                                                                                                                                                                                                                                                                                                                                                                                        |
| <b>Comparators:</b>  | Noninvasive positive pressure ventilation (CPAP, BiPAP®) or conventional oxygen (e.g., simple, Venturi, or nonrebreather oxygen masks)                                                                                                                                                                                                                                                                                                                                                                                                                                                                                                                                                                                                                                                                                                                |
| <b>Outcomes:</b>     | <p><b>Patient-centered Outcomes:</b> all-cause mortality (in-hospital and 90 day), intubation/reintubation (days of intubation), hospital length of stay, ICU admissions/transfers (ICU days), patient comfort, hospital readmissions (30 day) (e.g., all-cause, pneumonia), functional independence at discharge (e.g., scale scores, measures of independence/activities of daily living), discharge disposition</p> <p><b>Intermediate Outcomes:</b> respiratory rate, PaO<sub>2</sub>/FiO<sub>2</sub> ratio, SpO<sub>2</sub>, pH, PaO<sub>2</sub>, PaCO<sub>2</sub>, treatment escalation, device intolerance</p> <p><b>Cost/resource utilization</b></p> <p><b>Harms:</b> skin breakdown or pressure ulcers, gastric dysfunction, hospital-acquired pneumonia, compromised nutrition (enteral or parenteral nutrition), delirium, barotrauma</p> |
| <b>Timing:</b>       | Hospitalization for ARF or development of ARF while hospitalized; immediate post-extubation; post-surgery. Exclude pre-intubation/pre-oxygenation and HFNO oxygenation support during intubation                                                                                                                                                                                                                                                                                                                                                                                                                                                                                                                                                                                                                                                      |
| <b>Setting:</b>      | Hospital (including ICU, step down units, hospital wards), emergency department                                                                                                                                                                                                                                                                                                                                                                                                                                                                                                                                                                                                                                                                                                                                                                       |
| <b>Study Design:</b> | Randomized controlled trials, including crossover RCTs and cluster RCTs                                                                                                                                                                                                                                                                                                                                                                                                                                                                                                                                                                                                                                                                                                                                                                               |
| <b>Subgroups:</b>    | <p>Patient characteristics: age, race, gender</p> <p>Disease/diagnosis (e.g. COPD, cardiogenic pulmonary edema, immunosuppressed, post-extubation, post-surgery; hypoxic, hypercapnic, or mixed [hypoxic or hypercapnic] respiratory failure)</p> <p>Protocol/device settings (e.g., flow rate ≤30 vs. &gt;30 L/min; treatment duration &lt;6 vs. ≥6 hours)</p>                                                                                                                                                                                                                                                                                                                                                                                                                                                                                       |

BiPAP=Bilevel Positive Airway Pressure; CPAP=continuous positive airway pressure; ICU=intensive care unit; COPD= chronic obstructive pulmonary disease

### LITERATURE SEARCH

RCTs: We will search MEDLINE, Embase, CINAHL, and Cochrane Library from 2000 to August 2019

Clinicaltrials.gov for recently completed and/or on-going trials

Reference lists from relevant systematic reviews for references missed by our database searches

**Analytic Framework**

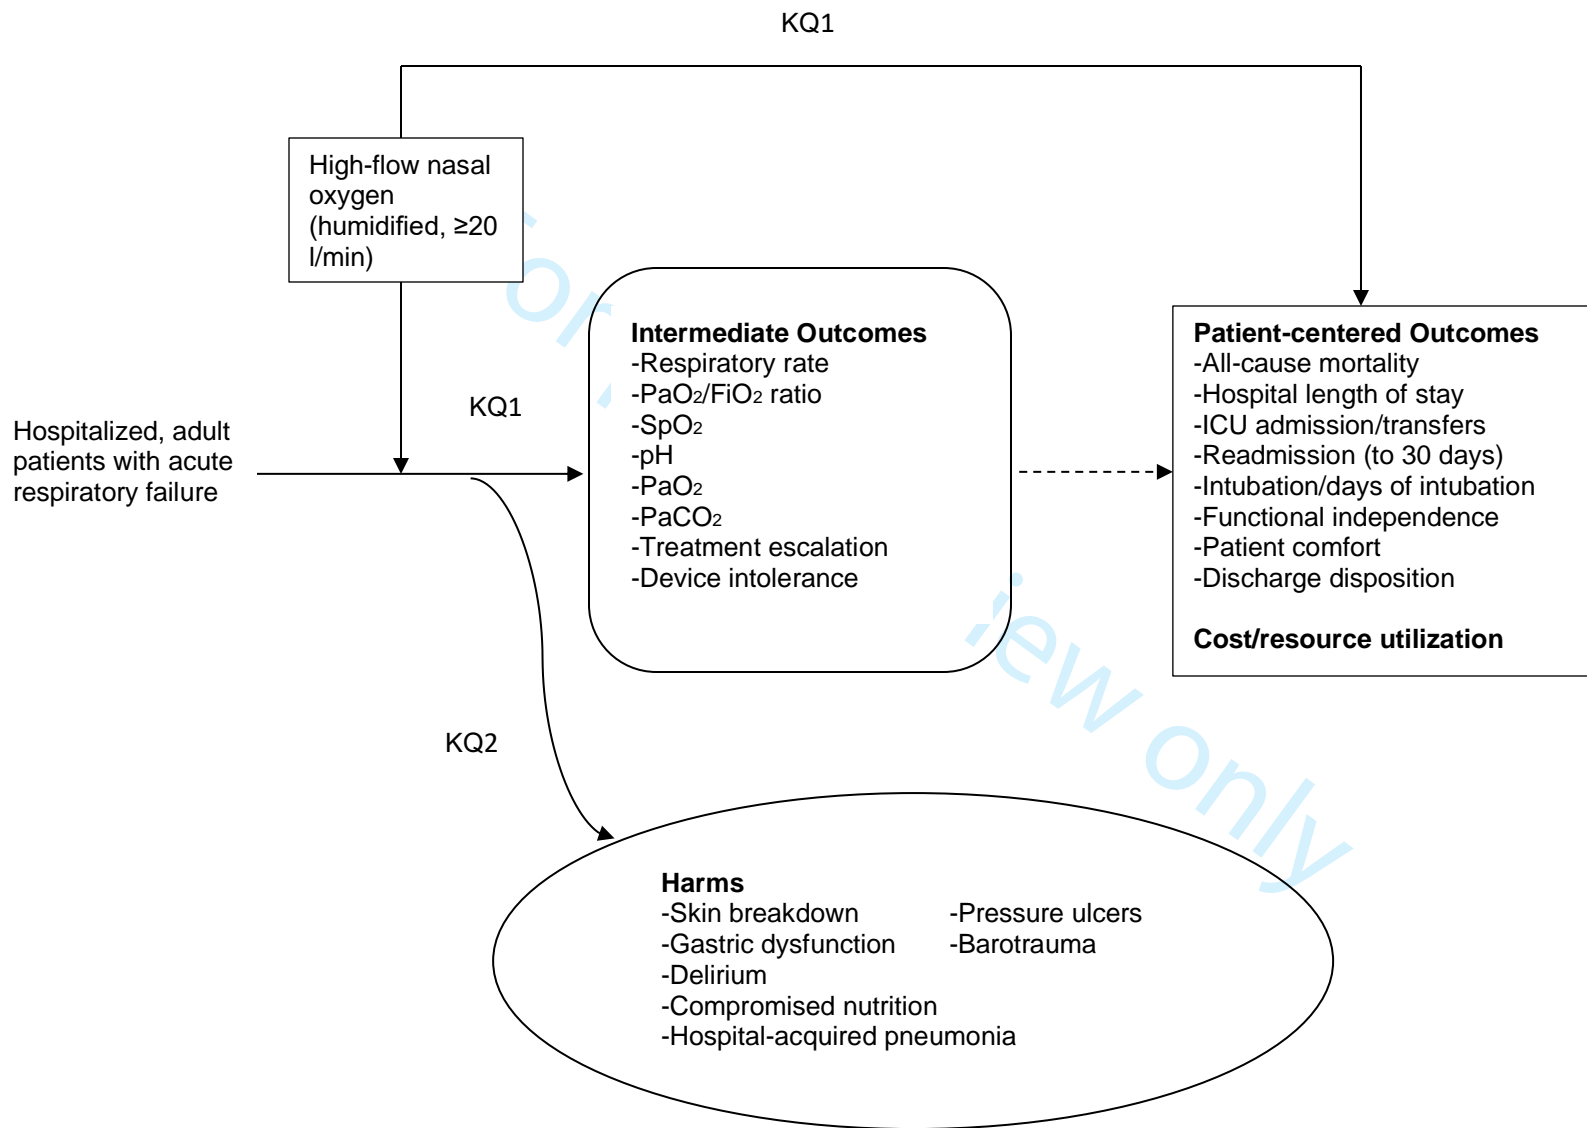

**Appendix B. MEDLINE® search strategy**

- 1 (high flow nasal adj2 (cannula\$ or oxygen\$ or therap\$ or insufflation\$)).mp.
- 2 high flow therapy.mp.
- 3 nasal high flow.mp.
- 4 high flow oxygen.mp.
- 5 (humidified high flow or humidified oxygen).mp.
- 6 (HFNC or HHFNC or HFNT or NHF or HFNO or HFOT or HFNOT).ti,ab.
- 7 (Vapotherm or Optiflow or "Comfort Flo").ti,ab.
- 8 or/1-7
- 9 remove duplicates from 8
- 10 (randomized controlled trial or controlled clinical trial).pt. or randomized.ab.
- 11 (random\$ adj (enroll\$ or assign\$ or allocat\$)).ti,ab.
- 12 ((randomi#ed or controlled or clinical) adj2 trial\$).ti,ab.
- 13 or/10-12
- 14 9 and 13
- 15 (meta-analy\$ or metaanaly\$ or meta analy\$).ti,ab.
- 16 exp Meta-Analysis/
- 17 (systematic adj2 (review\$ or overview\$)).ti,ab.
- 18 (rapid review or meta synthesis or metasyntesis or meta-synthesis or umbrella review or integrative review or data synthesis or review of reviews).ti,ab.
- 19 or/15-18
- 20 9 and 19
- 21 limit 14 to english language
- 22 limit 21 to yr="1995 -Current"
- 23 limit 22 to "all child (0 to 18 years)"
- 24 limit 23 to "all adult (19 plus years)"
- 25 22 not 23
- 26 24 or 25
- 27 limit 20 to english language
- 28 limit 27 to yr="2015 -Current"
- 29 limit 28 to "all child (0 to 18 years)"
- 30 limit 29 to "all adult (19 plus years)"
- 31 28 not 29
- 32 30 or 31

## Appendix C. Data extraction forms

Table 1. Study Characteristics

| Author, year<br>Country<br>Funding<br>Setting<br>Special population<br>Risk of Bias rating | Inclusion/Exclusion Criteria | Intervention (n)<br>Comparator (n)<br>Follow-up (primary outcome) | Demographics                                                                                                                                                                                                                                                                                                                                                                                      |
|--------------------------------------------------------------------------------------------|------------------------------|-------------------------------------------------------------------|---------------------------------------------------------------------------------------------------------------------------------------------------------------------------------------------------------------------------------------------------------------------------------------------------------------------------------------------------------------------------------------------------|
|                                                                                            | Inclusion:<br><br>Exclusion: | Intervention:<br><br>Comparator:<br><br>Follow-up:                | N=<br>Age (mean):<br>Race/ethnicity (%):<br>White:<br>Black:<br>Other:<br>Gender (% male):<br><br>Comorbidities (%):<br>Chronic Respiratory Failure:<br>COPD:<br>Congestive Heart Failure:<br><br>Comorbidity Index:<br><br>Baseline characteristics:<br>SpO <sub>2</sub> :<br>Respiratory Rate:<br>PaO <sub>2</sub> /FiO <sub>2</sub> ratio:<br>pH:<br>PaO <sub>2</sub> :<br>PaCO <sub>2</sub> : |
|                                                                                            |                              |                                                                   |                                                                                                                                                                                                                                                                                                                                                                                                   |

Table 2. Risk of Bias Assessment for Included Studies

| Author, Year | Random Sequence Generation | Allocation Concealment | Blinding of Participants/ Personnel | Blinding of Outcome Assessment | Incomplete Outcome Data | Selective Reporting | Overall Risk of Bias |
|--------------|----------------------------|------------------------|-------------------------------------|--------------------------------|-------------------------|---------------------|----------------------|
|              |                            |                        |                                     |                                |                         |                     |                      |
|              |                            |                        |                                     |                                |                         |                     |                      |
|              |                            |                        |                                     |                                |                         |                     |                      |
|              |                            |                        |                                     |                                |                         |                     |                      |

Table 3. Treatment Characteristics

| Author Year Setting Follow-up Comparator | Adherence/Intolerance describe measure |         | Treatment Settings |  |          |  | Treatment Weaning Criteria |                        |              |
|------------------------------------------|----------------------------------------|---------|--------------------|--|----------|--|----------------------------|------------------------|--------------|
|                                          | Intervention                           | Control | Protocol           |  | Received |  | Provider Discretion        | Protocol or Definition | Not Reported |
|                                          |                                        |         |                    |  |          |  |                            |                        |              |
|                                          |                                        |         |                    |  |          |  |                            |                        |              |
|                                          |                                        |         |                    |  |          |  |                            |                        |              |
|                                          |                                        |         |                    |  |          |  |                            |                        |              |

COT=conventional oxygen therapy; HFFM=high-flow face mask; HFNC=high-flow nasal cannula; NIV=non-invasive ventilation; NR=not reported; PEEP=positive end-expiratory pressure



**Table 4: Patient-Centered Outcomes, Part 1**

| Author Year<br>Setting<br>Follow-up<br>Comparator | All-cause Mortality<br>% (n/N) |         | ICU Admissions and/or Transfers<br>% (n/N)<br>(mean # of days) |         |              |         | Length of Hospital Stay<br>(mean # of days) |         |
|---------------------------------------------------|--------------------------------|---------|----------------------------------------------------------------|---------|--------------|---------|---------------------------------------------|---------|
|                                                   | Intervention                   | Control | Intervention                                                   | Control | Intervention | Control | Intervention                                | Control |
|                                                   |                                |         |                                                                |         |              |         |                                             |         |
|                                                   |                                |         |                                                                |         |              |         |                                             |         |
|                                                   |                                |         |                                                                |         |              |         |                                             |         |

CI=confidence interval; COT=conventional oxygen therapy; ED=emergency department; HR=hazard ratio; ICU=intensive care unit; IQR=interquartile range; NIV=Non-invasive ventilation; N/A=not applicable; NR=not reported; RD=risk difference; SD=standard deviation

**Table 5: Patient-Centered Outcomes, Part 2**

| Author Year<br>Setting<br>Follow-up<br>Comparator | Treatment Escalation<br>(describe) % (n/N) |         | Intubation<br>% (n/N)<br>(mean # of days) |         |              |         | Intubation Criteria |                        |              |
|---------------------------------------------------|--------------------------------------------|---------|-------------------------------------------|---------|--------------|---------|---------------------|------------------------|--------------|
|                                                   | Intervention                               | Control | Intervention                              | Control | Intervention | Control | Provider Discretion | Protocol or Definition | Not Reported |
|                                                   |                                            |         |                                           |         |              |         |                     |                        |              |
|                                                   |                                            |         |                                           |         |              |         |                     |                        |              |
|                                                   |                                            |         |                                           |         |              |         |                     |                        |              |

CI=confidence interval; COT=conventional oxygen therapy; ED=emergency department; HR=hazard ratio; ICU=intensive care unit; IQR=interquartile range; NIV=non-invasive ventilation; NR=not reported; VAS=visual analog scale

Table 6: Patient-Centered Outcomes, Part 3

| Author Year<br>Setting<br>Follow-up<br>Comparator | Discharge Disposition<br>% (n/N for each location) |         | Hospital Readmissions (30<br>day)<br>% (n/N) |         | Functional Independence<br>(mean, SD)—describe<br>measure |         | Patient Comfort (mean, SD) –<br>describe measure |         |
|---------------------------------------------------|----------------------------------------------------|---------|----------------------------------------------|---------|-----------------------------------------------------------|---------|--------------------------------------------------|---------|
|                                                   | Intervention                                       | Control | Intervention                                 | Control | Intervention                                              | Control | Intervention                                     | Control |
|                                                   |                                                    |         |                                              |         |                                                           |         |                                                  |         |
|                                                   |                                                    |         |                                              |         |                                                           |         |                                                  |         |
|                                                   |                                                    |         |                                              |         |                                                           |         |                                                  |         |
|                                                   |                                                    |         |                                              |         |                                                           |         |                                                  |         |

COT=conventional oxygen therapy; ED=emergency department; ICU=intensive care unit; IQR=interquartile range; NIV=non-invasive ventilation; NR=not reported; NS=not statistically significant

Discharge Disposition: home, assisted living facility, nursing home, long-term care hospital

Table 7: Patient-Centered Outcomes, Part 4

| Author Year<br>Setting<br>Follow-up<br>Comparator | Compromised Nutrition |         |                      |         | Gastric Dysfunction                           |         |                                                              |         |
|---------------------------------------------------|-----------------------|---------|----------------------|---------|-----------------------------------------------|---------|--------------------------------------------------------------|---------|
|                                                   | % (n/N)               |         | # days w/o nutrition |         | % (n/N) with placement of<br>nasogastric tube |         | % (n/N) with nausea,<br>vomiting, or abdominal<br>distension |         |
|                                                   | Intervention          | Control | Intervention         | Control | Intervention                                  | Control | Intervention                                                 | Control |
|                                                   |                       |         |                      |         |                                               |         |                                                              |         |
|                                                   |                       |         |                      |         |                                               |         |                                                              |         |
|                                                   |                       |         |                      |         |                                               |         |                                                              |         |
|                                                   |                       |         |                      |         |                                               |         |                                                              |         |

COT=conventional oxygen therapy; ED=emergency department; ICU=intensive care unit; NIV=non-invasive ventilation; NR=not reported

Compromised Nutrition: (enteral/parenteral nutrition or days without nutrition)

Gastric Dysfunction: (placement of a nasogastric tube for decompression or treatment of abdominal distension/nausea/vomiting)

**Table 8: Patient-Centered Outcomes, Part 5**

| Author Year<br>Setting<br>Follow-up<br>Comparator | Hospital-acquired<br>Pneumonia % (n/N) |         | Barotrauma<br>% (n/N) |         | Skin Breakdown or<br>Pressure Ulcers<br>% (n/N) |         | Delirium<br>% (n/N) |         |
|---------------------------------------------------|----------------------------------------|---------|-----------------------|---------|-------------------------------------------------|---------|---------------------|---------|
|                                                   | Intervention                           | Control | Intervention          | Control | Intervention                                    | Control | Intervention        | Control |
|                                                   |                                        |         |                       |         |                                                 |         |                     |         |
|                                                   |                                        |         |                       |         |                                                 |         |                     |         |
|                                                   |                                        |         |                       |         |                                                 |         |                     |         |
|                                                   |                                        |         |                       |         |                                                 |         |                     |         |

COT=conventional oxygen therapy; ED=emergency department; ICU=intensive care unit; NIV=non-invasive ventilation; N/A=not applicable; NR=not reported

Barotrauma: (pneumothorax, pneumomediastinum, pneumoperitoneum, or ventilator-induced lung injury)

**Table 9: Intermediate Outcomes, Part 1**

| Author Year<br>Setting<br>Follow-up<br>Comparator | Respiratory Rate<br>(mean, SD) |         | PaO <sub>2</sub> /FiO <sub>2</sub> ratio<br>(mean, SD) |         | SpO <sub>2</sub><br>(mean, SD) |         |
|---------------------------------------------------|--------------------------------|---------|--------------------------------------------------------|---------|--------------------------------|---------|
|                                                   | Intervention                   | Control | Intervention                                           | Control | Intervention                   | Control |
|                                                   |                                |         |                                                        |         |                                |         |
|                                                   |                                |         |                                                        |         |                                |         |
|                                                   |                                |         |                                                        |         |                                |         |
|                                                   |                                |         |                                                        |         |                                |         |

COT=conventional oxygen therapy; ED=emergency department; ICU=intensive care unit; IQR=interquartile range; NIV=non-invasive ventilation; NR=not reported; NS=not statistically significant; SD=standard deviation

**Table 10: Intermediate Outcomes, Part 2**

| Author Year<br>Setting<br>Follow-up<br>Comparator | pH<br>(mean, SD) |         | PaO <sub>2</sub><br>(mean, SD) |         | PaCO <sub>2</sub><br>(mean, SD) |         |
|---------------------------------------------------|------------------|---------|--------------------------------|---------|---------------------------------|---------|
|                                                   | Intervention     | Control | Intervention                   | Control | Intervention                    | Control |
|                                                   |                  |         |                                |         |                                 |         |
|                                                   |                  |         |                                |         |                                 |         |
|                                                   |                  |         |                                |         |                                 |         |
|                                                   |                  |         |                                |         |                                 |         |

COT=conventional oxygen therapy; ED=emergency department; ICU=intensive care unit; NIV=non-invasive ventilation; NR=not reported; SD=standard deviation

## PRISMA-P 2015 Checklist

This checklist has been adapted for use with systematic review protocol submissions to BioMed Central journals from Table 3 in Moher D et al: Preferred reporting items for systematic review and meta-analysis protocols (PRISMA-P) 2015 statement. *Systematic Reviews* 2015 4:1

An Editorial from the Editors-in-Chief of *Systematic Reviews* details why this checklist was adapted - Moher D, Stewart L & Shekelle P: Implementing PRISMA-P: recommendations for prospective authors. *Systematic Reviews* 2016 5:15

| Section/topic                     | #  | Checklist item                                                                                                                                                                                  | Information reported                |                          | Line number(s) |
|-----------------------------------|----|-------------------------------------------------------------------------------------------------------------------------------------------------------------------------------------------------|-------------------------------------|--------------------------|----------------|
|                                   |    |                                                                                                                                                                                                 | Yes                                 | No                       |                |
| <b>ADMINISTRATIVE INFORMATION</b> |    |                                                                                                                                                                                                 |                                     |                          |                |
| <b>Title</b>                      |    |                                                                                                                                                                                                 |                                     |                          |                |
| Identification                    | 1a | Identify the report as a protocol of a systematic review                                                                                                                                        | <input checked="" type="checkbox"/> | <input type="checkbox"/> | 4              |
| Update                            | 1b | If the protocol is for an update of a previous systematic review, identify as such                                                                                                              | <input type="checkbox"/>            | <input type="checkbox"/> | N/a            |
| <b>Registration</b>               | 2  | If registered, provide the name of the registry (e.g., PROSPERO) and registration number in the Abstract                                                                                        | <input checked="" type="checkbox"/> | 74                       | 74             |
| <b>Authors</b>                    |    |                                                                                                                                                                                                 |                                     |                          |                |
| Contact                           | 3a | Provide name, institutional affiliation, and e-mail address of all protocol authors; provide physical mailing address of corresponding author                                                   | <input checked="" type="checkbox"/> | <input type="checkbox"/> | 25-31          |
| Contributions                     | 3b | Describe contributions of protocol authors and identify the guarantor of the review                                                                                                             | <input checked="" type="checkbox"/> | <input type="checkbox"/> | 295-300        |
| <b>Amendments</b>                 | 4  | If the protocol represents an amendment of a previously completed or published protocol, identify as such and list changes; otherwise, state plan for documenting important protocol amendments | <input type="checkbox"/>            | <input type="checkbox"/> | N/a            |
| <b>Support</b>                    |    |                                                                                                                                                                                                 |                                     |                          |                |
| Sources                           | 5a | Indicate sources of financial or other support for the review                                                                                                                                   | <input checked="" type="checkbox"/> | <input type="checkbox"/> | 302-305        |
| Sponsor                           | 5b | Provide name for the review funder and/or sponsor                                                                                                                                               | <input checked="" type="checkbox"/> | <input type="checkbox"/> | 302-305        |
| Role of sponsor/funder            | 5c | Describe roles of funder(s), sponsor(s), and/or institution(s), if any, in developing the protocol                                                                                              | <input checked="" type="checkbox"/> | <input type="checkbox"/> | 302-305        |
| <b>INTRODUCTION</b>               |    |                                                                                                                                                                                                 |                                     |                          |                |
| <b>Rationale</b>                  | 6  | Describe the rationale for the review in the context of what is already known                                                                                                                   | <input checked="" type="checkbox"/> | <input type="checkbox"/> | 98-121         |

| Section/topic                             | #   | Checklist item                                                                                                                                                                                                            | Information reported                |                          | Line number(s)     |
|-------------------------------------------|-----|---------------------------------------------------------------------------------------------------------------------------------------------------------------------------------------------------------------------------|-------------------------------------|--------------------------|--------------------|
|                                           |     |                                                                                                                                                                                                                           | Yes                                 | No                       |                    |
| <b>Objectives</b>                         | 7   | Provide an explicit statement of the question(s) the review will address with reference to participants, interventions, comparators, and outcomes (PICO)                                                                  | <input checked="" type="checkbox"/> | <input type="checkbox"/> | 122-129            |
| <b>METHODS</b>                            |     |                                                                                                                                                                                                                           |                                     |                          |                    |
| <b>Eligibility criteria</b>               | 8   | Specify the study characteristics (e.g., PICO, study design, setting, time frame) and report characteristics (e.g., years considered, language, publication status) to be used as criteria for eligibility for the review | <input checked="" type="checkbox"/> | <input type="checkbox"/> | 125-167            |
| <b>Information sources</b>                | 9   | Describe all intended information sources (e.g., electronic databases, contact with study authors, trial registers, or other grey literature sources) with planned dates of coverage                                      | <input checked="" type="checkbox"/> | <input type="checkbox"/> | 137-187            |
| <b>Search strategy</b>                    | 10  | Present draft of search strategy to be used for at least one electronic database, including planned limits, such that it could be repeated                                                                                | <input checked="" type="checkbox"/> | <input type="checkbox"/> | 189-195            |
| <b>STUDY RECORDS</b>                      |     |                                                                                                                                                                                                                           |                                     |                          |                    |
| Data management                           | 11a | Describe the mechanism(s) that will be used to manage records and data throughout the review                                                                                                                              | <input checked="" type="checkbox"/> | <input type="checkbox"/> | 205-217            |
| Selection process                         | 11b | State the process that will be used for selecting studies (e.g., two independent reviewers) through each phase of the review (i.e., screening, eligibility, and inclusion in meta-analysis)                               | <input checked="" type="checkbox"/> | <input type="checkbox"/> | 197-203            |
| Data collection process                   | 11c | Describe planned method of extracting data from reports (e.g., piloting forms, done independently, in duplicate), any processes for obtaining and confirming data from investigators                                      | <input checked="" type="checkbox"/> | <input type="checkbox"/> | 205-217            |
| <b>Data items</b>                         | 12  | List and define all variables for which data will be sought (e.g., PICO items, funding sources), any pre-planned data assumptions and simplifications                                                                     | <input checked="" type="checkbox"/> | <input type="checkbox"/> | 209-216<br>157-173 |
| <b>Outcomes and prioritization</b>        | 13  | List and define all outcomes for which data will be sought, including prioritization of main and additional outcomes, with rationale                                                                                      | <input checked="" type="checkbox"/> | <input type="checkbox"/> | 157-173            |
| <b>Risk of bias in individual studies</b> | 14  | Describe anticipated methods for assessing risk of bias of individual studies, including whether this will be done at the outcome or study level, or both; state how this information will be used in data synthesis      | <input checked="" type="checkbox"/> | <input type="checkbox"/> | 256-270            |
| <b>DATA</b>                               |     |                                                                                                                                                                                                                           |                                     |                          |                    |
| <b>Synthesis</b>                          | 15a | Describe criteria under which study data will be quantitatively synthesized                                                                                                                                               | <input checked="" type="checkbox"/> | <input type="checkbox"/> | 219-233            |

| Section/topic                            | #   | Checklist item                                                                                                                                                                                                                              | Information reported                |                          | Line number(s) |
|------------------------------------------|-----|---------------------------------------------------------------------------------------------------------------------------------------------------------------------------------------------------------------------------------------------|-------------------------------------|--------------------------|----------------|
|                                          |     |                                                                                                                                                                                                                                             | Yes                                 | No                       |                |
|                                          | 15b | If data are appropriate for quantitative synthesis, describe planned summary measures, methods of handling data, and methods of combining data from studies, including any planned exploration of consistency (e.g., $I^2$ , Kendall's tau) | <input checked="" type="checkbox"/> | <input type="checkbox"/> | 199-211        |
|                                          | 15c | Describe any proposed additional analyses (e.g., sensitivity or subgroup analyses, meta-regression)                                                                                                                                         | <input checked="" type="checkbox"/> | <input type="checkbox"/> | 219-242        |
|                                          | 15d | If quantitative synthesis is not appropriate, describe the type of summary planned                                                                                                                                                          | <input checked="" type="checkbox"/> | <input type="checkbox"/> | 232-233        |
| <b>Meta-bias(es)</b>                     | 16  | Specify any planned assessment of meta-bias(es) (e.g., publication bias across studies, selective reporting within studies)                                                                                                                 | <input checked="" type="checkbox"/> | <input type="checkbox"/> | 266-270        |
| <b>Confidence in cumulative evidence</b> | 17  | Describe how the strength of the body of evidence will be assessed (e.g., GRADE)                                                                                                                                                            | <input checked="" type="checkbox"/> | <input type="checkbox"/> | 272-275        |

# BMJ Open

## Effectiveness and harms of high-flow nasal oxygen (HFNO) for acute respiratory failure: a systematic review protocol

|                                 |                                                                                                                                                                                                                                                                                                                                                                                                                                                                                                                                                                                                                                                                                                                                                    |
|---------------------------------|----------------------------------------------------------------------------------------------------------------------------------------------------------------------------------------------------------------------------------------------------------------------------------------------------------------------------------------------------------------------------------------------------------------------------------------------------------------------------------------------------------------------------------------------------------------------------------------------------------------------------------------------------------------------------------------------------------------------------------------------------|
| Journal:                        | <i>BMJ Open</i>                                                                                                                                                                                                                                                                                                                                                                                                                                                                                                                                                                                                                                                                                                                                    |
| Manuscript ID                   | bmjopen-2019-034956.R2                                                                                                                                                                                                                                                                                                                                                                                                                                                                                                                                                                                                                                                                                                                             |
| Article Type:                   | Protocol                                                                                                                                                                                                                                                                                                                                                                                                                                                                                                                                                                                                                                                                                                                                           |
| Date Submitted by the Author:   | 10-Dec-2019                                                                                                                                                                                                                                                                                                                                                                                                                                                                                                                                                                                                                                                                                                                                        |
| Complete List of Authors:       | Baldomero, Arianne; Minneapolis VA Health Care System; University of Minnesota, Pulmonary, Allergy, Critical Care, and Sleep Medicine<br>Melzer, Anne; Minneapolis VA Health Care System; University of Minnesota, Pulmonary, Allergy, Critical Care, and Sleep Medicine<br>Greer, Nancy; Minneapolis VA Health Care System, Center for Care Delivery and Outcomes Research<br>Majeski, Brittany; Minneapolis VA Health Care System, Center for Care Delivery and Outcomes Research<br>Macdonald, Roderick; Minneapolis VA Health Care System, Center for Care Delivery and Outcomes Research<br>Wilt, Timothy; Minneapolis VA Health Care System, Center for Care Delivery and Outcomes Research; University of Minnesota, Department of Medicine |
| <b>Primary Subject Heading</b>: | General practice / Family practice                                                                                                                                                                                                                                                                                                                                                                                                                                                                                                                                                                                                                                                                                                                 |
| Secondary Subject Heading:      | Respiratory medicine, Intensive care, Evidence based practice                                                                                                                                                                                                                                                                                                                                                                                                                                                                                                                                                                                                                                                                                      |
| Keywords:                       | RESPIRATORY MEDICINE (see Thoracic Medicine), INTERNAL MEDICINE, INTENSIVE & CRITICAL CARE, Adult thoracic medicine < THORACIC MEDICINE, GENERAL MEDICINE (see Internal Medicine), Adult intensive & critical care < INTENSIVE & CRITICAL CARE                                                                                                                                                                                                                                                                                                                                                                                                                                                                                                     |
|                                 |                                                                                                                                                                                                                                                                                                                                                                                                                                                                                                                                                                                                                                                                                                                                                    |

SCHOLARONE™  
Manuscripts

**PROTOCOL:****Effectiveness and harms of high-flow nasal oxygen (HFNO)  
for acute respiratory failure: a systematic review protocol****Authors' full names:**

Arianne K. Baldomero, MD, MS<sup>1,2</sup>

Anne Melzer, MD, MS<sup>1,2</sup>

Nancy Greer, PhD<sup>3</sup>

Brittany N. Majeski, BA<sup>3</sup>

Roderick MacDonald, MS<sup>3</sup>

Timothy J. Wilt, MD, MPH<sup>3,4</sup>

**Authors' affiliation(s):**

1: Division of Pulmonary, Allergy, Critical Care, and Sleep Medicine, Department of Medicine, Minneapolis Veterans Affairs Healthcare System, Minneapolis, MN, USA

2: Division of Pulmonary, Allergy, Critical Care, and Sleep Medicine, Department of Medicine, University of Minnesota, Minneapolis, MN, USA

3: Center for Care Delivery and Outcomes Research, Minneapolis Veterans Affairs Healthcare System, Minneapolis, MN, USA

4: Department of Medicine, University of Minnesota, Minneapolis, MN, USA



1  
2  
3 25 **Corresponding author full contact details:**  
4

5 26 Name: Arianne Baldomero, MD, MS  
6

7 27 Address: 1 Veterans Drive,  
8

9 28 Post code: Pulmonary 111N  
10

11 29 City: Minneapolis, MN  
12

13 30 Country: USA  
14

15 31 Email: baldo004@umn.edu  
16  
17  
18 32  
19 33  
20 34  
21 35  
22  
23  
24  
25  
26  
27  
28  
29  
30  
31  
32  
33  
34  
35  
36  
37  
38  
39  
40  
41  
42  
43  
44  
45  
46  
47  
48  
49  
50  
51  
52  
53  
54  
55  
56  
57  
58  
59  
60

## 36 **ABSTRACT**

### 38 **Introduction**

39 High-flow nasal oxygen (HFNO) use in adults hospitalized with acute respiratory failure  
40 (ARF) is increasing. However, evidence to support widespread use of HFNO compared to  
41 noninvasive ventilation (NIV) and conventional oxygen therapy (COT) is unclear. This protocol  
42 describes the methods for a systematic evidence review regarding the comparative  
43 effectiveness and harms of HFNO compared to NIV or COT for the management of ARF in  
44 hospitalized adult patients.

### 46 **Methods and analysis**

47 We will search MEDLINE®, Embase, CINAHL, and Cochrane Library for randomized-  
48 controlled trials (RCTs) of adult patients hospitalized with ARF or who developed ARF while  
49 hospitalized. ARF will be defined as  $SpO_2 < 90\%$ ,  $PaO_2:FiO_2$  ratio  $\leq 300$ ,  $PaO_2 \leq 60$  mmHg, or  
50  $PaCO_2 \geq 45$  mmHg. The intervention is HFNO (humidified oxygen, flow rate  $\geq 20$  L/min)  
51 compared separately to NIV or COT. The critical outcomes are: all-cause mortality, hospital-  
52 acquired pneumonia, intubation/reintubation (days of intubation), intensive care unit (ICU)  
53 admission/transfers, patient comfort, and hospital length of stay. The important outcomes are:  
54 delirium, 30-day hospital readmissions, barotrauma, compromised nutrition (enteral or  
55 parenteral nutrition), gastric dysfunction, functional independence at discharge, and skin  
56 breakdown or pressure ulcers. We will calculate risk ratios and Peto odds ratios (for rare events)  
57 and corresponding 95% confidence intervals for categorical outcomes. Mean and standardized  
58 mean difference will be calculated for continuous outcomes. Where possible and appropriate,  
59 meta-analysis will be performed for each outcome.

### 61 **Conclusion**

1  
2  
3 62 This systematic review will provide a comprehensive evaluation of the evidence  
4  
5 63 regarding the comparative effectiveness and harms of HFNO compared to NIV or COT for the  
6  
7 64 management of ARF in hospitalized adult patients to inform clinical practice and to identify  
8  
9 65 research gaps in the management of ARF in hospitalized adults. The results will inform the work  
10  
11 66 of the ACP-CGC in their development of a clinical guideline related to use of HFNO in adult  
12  
13 67 patients with ARF.  
14  
15

16 68

### 17 69 **Ethics and dissemination**

19  
20 70 No ethical approval will be needed because we will be using data from previously  
21  
22 71 published studies in which informed consent was obtained by the primary investigators. We will  
23  
24 72 publish our results in a peer-reviewed journal.  
25

26 73

27  
28 74 **PROSPERO registration:** CRD42019146691  
29

30 75

31  
32 76 **MeSH keywords:** systematic review; oxygen inhalation therapy; respiratory failure; respiratory  
33  
34 77 tract diseases; positive-pressure respiration; high-flow nasal oxygen  
35

36 78

37  
38  
39 79 **Word count:** 1,969  
40

41 80

### 42 81 **Strengths and limitations of this study:**

- 43  
44  
45 82
  - We will compare high-flow nasal oxygen (HFNO) to both noninvasive ventilation and
- 46  
47 83 conventional oxygen therapy.
- 48  
49 84
  - We will evaluate the efficacy and harms of HFNO in a wide-range of clinical conditions
- 50  
51 85 (e.g. chronic obstructive pulmonary disease, cardiogenic pulmonary edema,
- 52  
53 86 immunosuppressed, post-surgery, post-extubation, etc.) and multiple clinical settings  
54  
55  
56  
57  
58  
59  
60

1  
2  
3 87 (emergency department, intensive care unit, intermediate/step-down unit, and hospital  
4  
5 88 ward).

6  
7 89 ▪ The comprehensive list of clinically-relevant outcomes that will be evaluated in this  
8  
9 90 systematic evidence review was developed with input from physician and nonphysician  
10  
11 91 public representatives.

12  
13 92 ▪ This systematic evidence review of HFNO will be limited to studies evaluating patients  
14  
15 93 who meet criteria for acute respiratory failure.

16  
17 94 ▪ We will exclude studies that evaluated HFNO for oxygenation support before  
18  
19 95 (preoxygenation) and during intubation.  
20  
21

22 96  
23  
24  
25  
26  
27  
28  
29  
30  
31  
32  
33  
34  
35  
36  
37  
38  
39  
40  
41  
42  
43  
44  
45  
46  
47  
48  
49  
50  
51  
52  
53  
54  
55  
56  
57  
58  
59  
60

## 97 INTRODUCTION

98 High-flow nasal oxygen (HFNO) therapy is a mode of noninvasive oxygen support that  
99 has been used in neonatal and pediatric settings for over a decade. In recent years, HFNO use  
100 in adults hospitalized with acute respiratory failure (ARF) has been increasing. HFNO delivers  
101 warmed, humidified oxygen with fraction of inspired oxygen (FiO<sub>2</sub>) up to 1.0 and maximum flow  
102 rate of 60 L/min. Several potential physiologic advantages of HFNO over noninvasive ventilation  
103 (NIV) and conventional oxygen therapy (COT) have been proposed (1, 2). These include patient  
104 comfort (3-5), improved oxygenation and ventilation (6, 7), clearance of airway secretions (8, 9),  
105 and reduced work of breathing (4, 10, 11). These theoretical benefits are attributed to HFNO  
106 delivery through small, pliable nasal cannula, washout of anatomic dead space (12), high  
107 oxygen flow rates (13, 14), generation of low level positive-end expiratory pressure (PEEP) (15-  
108 19), and heated humidification.

109 Given the increasing use of HFNO and the lack of robust evidence to support its  
110 widespread use in adult patients with ARF, the Minnesota Evidence Synthesis and  
111 Dissemination Center was commissioned by the American College of Physicians (ACP) to  
112 systematically review the evidence regarding the comparative effectiveness and harms of  
113 HFNO compared to NIV or COT for the management of ARF in hospitalized adult patients.  
114 Compared to existing reviews in this area, this systematic evidence review will include a broader  
115 scope that will compare HFNO to both NIV and COT, assess a wider range of clinical conditions  
116 in multiple clinical settings, and evaluate a more comprehensive list of key clinical outcomes.  
117 Furthermore, an updated review will include evidence from recently published clinical trials. This  
118 systematic review will be used by the ACP-Clinical Guidelines Committee (ACP-CGC) to  
119 develop a clinical practice guideline for the use of HFNO in acute respiratory failure. With input  
120 from the ACP-Clinical Guidelines Committee (ACP-CGC) (20) and a technical expert panel  
121 (TEP), we developed the following key questions (KQ):

1  
2  
3 122 KQ 1. What is the comparative effectiveness of HFNO versus NIV or COT for hospitalized  
4  
5 123 patients with ARF? Does comparative effectiveness of HFNO vary by patient  
6  
7 124 characteristics, disease/diagnosis characteristics, protocol/device settings, or location of  
8  
9 125 administration?  
10

11 126  
12  
13 127 KQ 2. What are the harms of HFNO versus NIV or COT for hospitalized patients with  
14  
15 128 ARF? Do harms vary by patient characteristics, disease/diagnosis, protocol/device  
16  
17 129 settings, or location of administration?  
18  
19

20 130

## 21 131 **METHODS**

22 132 In accordance with the guidelines, our systematic review protocol was registered with  
23  
24 133 the International Prospective Register of Systematic Reviews (PROSPERO) on August 8, 2019.  
25  
26 134 We will report our findings according to the Preferred Reporting Items for Systematic Reviews  
27  
28 135 and Meta-Analyses (PRISMA) 2009 statement (21).  
29  
30

31 136

### 32 137 **Eligibility criteria**

33  
34  
35 138 All studies that will be included in this systematic review will be selected in accordance  
36  
37 139 with the PICOTS (Population, Intervention, Comparison, Outcomes, Timing, Study Design)  
38  
39 140 framework (Appendix A). A study will be included if at least 75% of the participants meet the  
40  
41 141 inclusion criteria.  
42  
43

44 142

### 45 143 **Population**

46  
47 144 We will include all adult patients (age  $\geq 18$  years) with ARF at the time of study enrollment.  
48  
49 145 A study will be included if at least one criterion for ARF is met:  $SpO_2 < 90\%$ ,  $PaO_2:FIO_2$   
50  
51 146 ratio  $\leq 300$ ,  $PaO_2 \leq 60$  mmHg, or  $PaCO_2 \geq 45$  mmHg.  
52  
53

54 147  
55  
56  
57  
58  
59  
60

1  
2  
3 148 **Intervention**

4  
5 149 The intervention of interest is HFNO, defined as humidified oxygen with flow rates  $\geq 20$   
6  
7 150 L/min.  
8

9 151

10  
11 152 **Comparators**

12  
13 153 We will compare HFNO vs. NIV (continuous or bilevel positive airway pressure ventilation  
14  
15 [CPAP or BiPAP®]) and HFNO vs. COT (e.g. oxygen delivered through nasal cannula,  
16 154  
17 simple face mask, air-entrainment mask, partial rebreathing mask, non-rebreather mask,  
18 155  
19 etc.).  
20 156  
21

22 157

23  
24 158 **Outcome measures**

25  
26 159 We will examine several patient-related outcomes and intermediate outcomes. With input  
27  
28 160 from the ACP-CGC that included physician and nonphysician public representatives,  
29  
30 161 outcomes were identified as critical or important. The critical outcomes are: all-cause  
31  
32 162 mortality (in-hospital and the longest available through 90 days), hospital-acquired  
33  
34 163 pneumonia, intubation/reintubation (days of intubation), intensive care unit (ICU)  
35  
36 164 admission/transfers, patient comfort, and hospital length of stay. The important outcomes  
37  
38 165 are: delirium, 30-day hospital readmissions, barotrauma (pneumothorax,  
39  
40 166 pneumomediastinum, pneumoperitoneum, or ventilator-induced lung injury), compromised  
41  
42 167 nutrition (enteral or parenteral nutrition), gastric dysfunction (placement of nasogastric  
43  
44 168 tube, abdominal distension, nausea, or vomiting), functional independence at discharge,  
45  
46 169 discharge disposition (home, assisted-living facility, nursing home, or long-term care  
47  
48 170 hospital), and skin breakdown or pressure ulcers. Intermediate outcomes are: respiratory  
49  
50 171 rate,  $\text{PaO}_2/\text{FiO}_2$  ratio,  $\text{SpO}_2$ , pH,  $\text{PaO}_2$ ,  $\text{PCO}_2$ , treatment escalation, and device  
51  
52 172 intolerance. If multiple points are reported, we will categorize these as “short” (first time  
53  
54  
55  
56  
57  
58  
59  
60

1  
2  
3 173 point) and “longer” (last time point) term outcomes. We will also explore analyses based  
4  
5 174 on commonly reported time points.  
6

7 175

8  
9 176 ***Timing***

10  
11 177 We will include patients hospitalized for ARF or who developed ARF while hospitalized,  
12  
13 178 including patients with ARF post-extubation or post-surgery. We will exclude studies  
14  
15 179 evaluating HFNO for oxygenation support before (preoxygenation) and during intubation.  
16  
17 180

18  
19  
20 181 ***Setting***

21  
22 182 We will include studies that randomized patients in the hospital (including hospital wards,  
23  
24 183 intermediate/step-down units, and intensive care units) and emergency department.  
25

26 184

27  
28 185 ***Study design***

29  
30 186 Randomized controlled trials (RCTs) including crossover RCTs and cluster RCTs with full-  
31  
32 187 text reports in English will be included. We will exclude non-randomized trials and  
33  
34 188 observational studies.  
35

36 189

37  
38  
39 190 **Data sources and search strategy**

40  
41 191 We will search MEDLINE<sup>®</sup>, Embase, CINAHL, and Cochrane Library from January 2000  
42  
43 192 to August 2019. HFNO was not widely used in adults prior to 2000.” The literature search will be  
44  
45 193 updated prior to preparation of the final report. The search strategy for the MEDLINE<sup>®</sup> search is  
46  
47 194 provided in Appendix B. We will search references of the primary studies and published  
48  
49 195 systematic reviews for relevant studies. We will also search ClinicalTrials.gov for recently  
50  
51 196 completed or ongoing clinical trials.  
52

53 197

54  
55  
56 198 **Study selection process**



1  
2  
3 199 We will conduct the study selection in two stages: stage one is abstract triage and stage  
4  
5 200 two is full-text triage. All studies in stage one and stage two of the study selection process will  
6  
7 201 be reviewed independently by two members of the review team. Abstracts included by one  
8  
9 202 reviewer will move on to full-text review. At the full text review stage, both reviewers must agree  
10  
11 203 on study inclusion or exclusion. Disagreements will be resolved through discussion and  
12  
13 204 evaluation by a third reviewer, if needed.  
14  
15  
16 205

### 17 18 206 **Data extraction and management**

19  
20 207 Data extraction forms will be piloted by three members of the review team. Final data  
21  
22 208 extraction will be conducted by one investigator with verification by a second team member.  
23  
24 209 Disagreements in data extraction will be resolved by consensus that includes the senior  
25  
26 210 investigator (TJW). Data that will be extracted include information related to study  
27  
28 211 characteristics (primary author, year published, country, funding source, setting, and study  
29  
30 212 population); participant inclusion and exclusion criteria; descriptions of intervention and  
31  
32 213 comparator (oxygen therapy or NIV settings, adjustment parameters, and follow-up duration);  
33  
34 214 participant demographics (age, race/ethnicity, gender, comorbidities, and baseline physiologic  
35  
36 215 parameters such as SpO<sub>2</sub>, respiratory rate, PaO<sub>2</sub>/FiO<sub>2</sub> ratio, pH, PaO<sub>2</sub>, and PCO<sub>2</sub>); and outcome  
37  
38 216 data (patient-centered outcomes and intermediate outcomes). The data extraction form with the  
39  
40 217 full list of information that will be extracted is provided in Appendix C. Data will be extracted  
41  
42 218 similarly for all eligible studies and then subgroup analyses will be performed.  
43  
44  
45 219

### 46 47 220 **Data synthesis and analysis**

48  
49 221 We will examine the clinical and methodological heterogeneity to determine  
50  
51 222 appropriateness of quantitative synthesis. Cluster RCTs will be evaluated for statistical  
52  
53 223 measures that adjust for clustering. Analyses will be conducted by a systematic review  
54  
55 224 methodologist. We will use Comprehensive Meta Analysis V.3 or R for pooled analyses. We will  
56  
57  
58  
59  
60

1  
2  
3 225 calculate risk ratios and Peto odds ratios (for rare events) and corresponding 95% confidence  
4  
5 226 intervals for categorical outcomes. Mean and standardized mean difference will be calculated  
6  
7 227 for continuous outcomes. Heterogeneity will be assessed by using the  $I^2$  statistic, Chi-squared  
8  
9 228 test, and visual inspection of the forest plots. An  $I^2$  statistic of 75% or greater may indicate  
10  
11 229 substantial heterogeneity. If heterogeneity exists, we will conduct subgroup analyses to explore  
12  
13 230 potential causes of heterogeneity. We will pool clinically homogeneous (population, intervention,  
14  
15 231 setting, outcome measures) studies with sufficient outcomes information. Our primary analysis  
16  
17 232 will include studies deemed of low to moderate risk of bias. We will conduct sensitivity analyses  
18  
19 233 that includes data from studies deemed to be high risk of bias. For analyses involving two  
20  
21 234 subgroups, Chi-squared test will be used to assess differences between the groups. If  
22  
23 235 applicable, when there are more than two subgroups, meta-regression will be applied to explore  
24  
25 236 the relationship between the subgroup characteristics and the treatment effects (22). Meta-  
26  
27 237 regression will only be considered if there are more than ten studies in a meta-analysis. Meta-  
28  
29 238 regression will be performed using the 'metafor' package for R. If quantitative synthesis is not  
30  
31 239 appropriate, findings will be summarized narratively.  
32  
33  
34  
35

240

### 241 **Subgroup analysis**

38  
39 242 If sufficient data allows, we plan to perform analysis on the following subgroups of  
40  
41 243 interest: (1) noninvasive ventilator (NIV) vs. conventional oxygen therapy (COT); (2) emergency  
42  
43 244 department (ED), ICU, hospital ward/step down, or mixed settings; (3) chronic obstructive  
44  
45 245 pulmonary disease (COPD), cardiogenic pulmonary edema/acute decompensated heart failure,  
46  
47 246 pneumonia, obese, post-extubation, post-surgical, immunocompromised, (4) hypoxic,  
48  
49 247 hypercapnic, and mixed (hypoxic or hypercapnic) respiratory failure; (5) treatment duration <6  
50  
51 248 vs. ≥6 hours; and (6) lower (≤30 L/min) vs. higher (>30 L/min) flow settings.

53  
54 249 We hypothesize that: (1) HFNO is more beneficial than COT, but is as effective, though  
55  
56 250 less comfortable, than NIV; (2) the efficacy of HFNO is likely the same as NIV, but better than  
57  
58  
59

1  
2  
3 251 COT, in different settings; (3) HFNO is as effective as NIV in COPD, pneumonia, post-  
4  
5 252 extubation, and post-surgical patients; (4) HFNO is less effective than NIV in cardiogenic  
6  
7 253 pulmonary edema and obesity due to lower level of PEEP; (5) HFNO is more effective than  
8  
9 254 COT in most disease states; (6) HFNO is more effective and less harmful than NIV in hypoxic  
10  
11 255 respiratory failure, but is less effective in hypercapnic and mixed hypoxic and hypercapnic  
12  
13 256 respiratory failure; and (7) higher flow (>30 L/min) is more effective, but is less comfortable, than  
14  
15 257 lower flow ( $\leq 30$  L/min) settings. If subgroup analyses are performed, we will assess subgroup  
16  
17 258 effects with an  $I^2$  statistic for subgroup differences. The  $I^2$  statistic delineates the percentage of  
18  
19 259 variability in the estimates of effect between the different subgroups that is due to real subgroup  
20  
21 260 differences (as opposed to sampling error).  
22  
23  
24  
25

261

## 262 **Assessment of bias in individual studies**

263 We will assess the risk of bias using a modification of the Cochrane guidance for  
264 randomized trials (23). Individual elements will be rated low, unclear, or high risk of bias. Our  
265 modification of the tool is to identify overall study risk of bias as low, moderate, or high. A study  
266 with unclear elements will be considered moderate risk of bias. Components of risk of bias  
267 assessment will include sequence generation, allocation concealment, blinding, attrition, and  
268 appropriateness of analytic methods. One reviewer will conduct risk of bias assessments at the  
269 study level and will be verified by a second reviewer. Disagreements will be resolved through  
270 discussion and evaluation by a third reviewer. If appropriate, we may conduct sensitivity  
271 analyses excluding high risk of bias studies.

272 We will attempt to reduce the risk of publication bias by doing a comprehensive search  
273 across multiple data bases and with input from ACP-CGC and TEP members. We will conduct  
274 funnel plot analysis to assess for publication bias across studies if sufficient studies are found.  
275 We will look at protocol papers, where available, to assess whether outcomes were pre-  
276 specified and whether all outcomes are reported.

1  
2  
3 277  
45 278 **Assessment of the certainty of the body of evidence**

6  
7 279 We will use the Grading of Recommendations, Assessment, Development, and  
8  
9 280 Evaluation (GRADE) methodology to rate overall certainty of evidence for the critical outcomes  
10  
11 281 identified by the ACP as high, moderate, low, or very low (24, 25).  
12

13 282

14 283 **Patient and public involvement**

15  
16 284 The list of patient-centered outcomes that will be evaluated in this systematic evidence  
17  
18 285 review was developed and rated as critical or important with input from nonphysician public  
19  
20 286 representatives.  
21

22 287

23 288 **Ethics and dissemination**

24  
25  
26 289 No ethical approval will be needed because we will be using data from previously  
27  
28 290 published studies in which informed consent was obtained by the primary investigators. We will  
29  
30 291 publish our results in a peer-reviewed journal.  
31

32 292

33 293 **CONCLUSION**

34  
35  
36 294 This systematic review will provide a comprehensive evaluation of the evidence  
37  
38 295 regarding the comparative effectiveness and harms of HFNO compared to NIV or COT for the  
39  
40 296 management of ARF in hospitalized adult patients to inform clinical practice and to identify  
41  
42 297 research gaps in the management of acute respiratory failure in hospitalized adults. The results  
43  
44 298 will inform the work of the ACP-CGC in their development of a clinical guideline related to use of  
45  
46 299 HFNO in adult patients with ARF.  
47

48 300

49  
50 301 **Author contributions:** TJW is the guarantor. AKB, AM, NG, BNM, TJW contributed to study  
51  
52 302 design and the PROSPERO protocol. NG developed the search strategy and the risk of bias  
53

1  
2  
3 303 assessment strategy. BNM and NG developed the data extraction tables. AKB drafted the  
4  
5 304 protocol manuscript. AKB and AM provided expertise on acute respiratory failure management.  
6  
7 305 RM provided statistical expertise. All authors provided critical revisions and approved the final  
8  
9 306 manuscript.

10  
11 307

12  
13  
14 308 **Funding:** This review is funded by a contract with the American College of Physicians (ACP).  
15  
16 309 The ACP-Clinical Guideline Committee (CGC) assisted in the development of key questions,  
17  
18 310 study inclusion criteria, and outcome measures of interest but will not be involved in data  
19  
20 311 collection, analysis, or manuscript preparation.

21  
22 312

23  
24 313 **Acknowledgements:** The evidence review team would like to acknowledge the ACP-CGC, the  
25  
26 314 public representatives, and the technical expert panel (TEP) members who have provided  
27  
28 315 valuable feedback on the protocol development. The TEP members are: Charles Carpati, MD;  
29  
30 316 Andrew Dunn, MD, MPH, SFHM, MACP; Matthew G. Drake, MD; and Robert C. Hyzy, MD.

31  
32 317

33  
34  
35 318 **Competing interests:** TJW is Chair of the ACP-CGC. He will be recused from voting on or  
36  
37 319 authoring the ACP guidelines. All other authors have no conflict of interests to declare.

38  
39 320

40  
41 321 **Data statement:** Data sharing is not applicable as no datasets were generated and/or analyzed  
42  
43 322 for this protocol paper.

44  
45 323

46  
47 324  
48  
49  
50  
51  
52  
53  
54  
55  
56  
57  
58  
59  
60

## References

1. Spoletini G, Cortegiani A, Gregoretti C. Physiopathological rationale of using high-flow nasal therapy in the acute and chronic setting: A narrative review. *Trends in Anaesthesia and Critical Care* 2019; 26-27: 22-29.
2. Cortegiani A, Accurso G, Mercadante S, Giarratano A, Gregoretti C. High flow nasal therapy in perioperative medicine: from operating room to general ward. *BMC Anesthesiology* 2018; 18: 1-8.
3. Roca O, Riera J, Torres F, Masclans JR. High-flow oxygen therapy in acute respiratory failure. *Respir Care* 2010; 55: 408-413.
4. Rittayamai N, Tscheikuna J, Rujjwit P. High-flow nasal cannula versus conventional oxygen therapy after endotracheal extubation: a randomized crossover physiologic study. *Respir Care* 2014; 59: 485-490.
5. Cortegiani A, Crimi C, Noto A, Helviz Y, Giarratano A, Gregoretti C, Einav S. Effect of high-flow nasal therapy on dyspnea, comfort, and respiratory rate. *Crit Care*. England; 2019. p. 201.
6. Tiruvoipati R, Lewis D, Haji K, Botha J. High-flow nasal oxygen vs high-flow face mask: a randomized crossover trial in extubated patients. *J Crit Care* 2010; 25: 463-468.
7. Sztrymf B, Messika J, Mayot T, Lenglet H, Dreyfuss D, Ricard JD. Impact of high-flow nasal cannula oxygen therapy on intensive care unit patients with acute respiratory failure: a prospective observational study. *J Crit Care* 2012; 27: 324.e329-313.
8. Williams R, Rankin N, Smith T, Galler D, Seakins P. Relationship between the humidity and temperature of inspired gas and the function of the airway mucosa. *Crit Care Med* 1996; 24: 1920-1929.
9. Hasani A, Chapman TH, McCool D, Smith RE, Dilworth JP, Agnew JE. Domiciliary humidification improves lung mucociliary clearance in patients with bronchiectasis. *Chron Respir Dis* 2008; 5: 81-86.
10. Sztrymf B, Messika J, Bertrand F, Hurel D, Leon R, Dreyfuss D, Ricard JD. Beneficial effects of humidified high flow nasal oxygen in critical care patients: a prospective pilot study. *Intensive Care Med* 2011; 37: 1780-1786.
11. Lenglet H, Sztrymf B, Leroy C, Brun P, Dreyfuss D, Ricard JD. Humidified high flow nasal oxygen during respiratory failure in the emergency department: feasibility and efficacy. *Respir Care* 2012; 57: 1873-1878.
12. Möller W, Feng S, Domanski U, Franke KJ, Celik G, Bartenstein P, Becker S, Meyer G, Schmid O, Eickelberg O, Tatkov S, Nilius G. Nasal high flow reduces dead space. *J Appl Physiol* (1985); 2017. p. 191-197.
13. Ritchie JE, Williams AB, Gerard C, Hockey H. Evaluation of a humidified nasal high-flow oxygen system, using oxygraphy, capnography and measurement of upper airway pressures. *Anaesth Intensive Care* 2011; 39: 1103-1110.
14. Sim MA, Dean P, Kinsella J, Black R, Carter R, Hughes M. Performance of oxygen delivery devices when the breathing pattern of respiratory failure is simulated. *Anaesthesia* 2008; 63: 938-940.
15. Parke RL, McGuinness SP. Pressures delivered by nasal high flow oxygen during all phases of the respiratory cycle. *Respir Care* 2013; 58: 1621-1624.
16. Parke RL, Eccleston ML, McGuinness SP. The effects of flow on airway pressure during nasal high-flow oxygen therapy. *Respir Care* 2011; 56: 1151-1155.
17. Groves N, Tobin A. High flow nasal oxygen generates positive airway pressure in adult volunteers. *Aust Crit Care* 2007; 20: 126-131.
18. Parke R, McGuinness S, Eccleston M. Nasal high-flow therapy delivers low level positive airway pressure. *Br J Anaesth* 2009; 103: 886-890.

- 1  
2  
3 375 19. Corley A, Caruana LR, Barnett AG, Tronstad O, Fraser JF. Oxygen delivery through high-  
4 376 flow nasal cannulae increase end-expiratory lung volume and reduce respiratory rate in  
5 377 post-cardiac surgical patients. *Br J Anaesth* 2011; 107: 998-1004.  
6 378 20. Qaseem A, Kansagara D, Lin JS, Mustafa RA, Wilt TJ. The Development of Clinical  
7 379 Guidelines and Guidance Statements by the Clinical Guidelines Committee of the  
8 380 American College of Physicians: Update of Methods. *Annals of Internal Medicine* 2019;  
9 381 170: 863-870.  
10 382 21. Moher D, Liberati A, Tetzlaff J, Altman D, Group TP. Preferred Reporting Items for  
11 383 Systematic Reviews and Meta-Analyses: The PRISMA Statement. *Annals of Internal*  
12 384 *Medicine* 2009; 151: 264-269.  
13 385 22. Thompson SG, Higgins JP. How should meta-regression analyses be undertaken and  
14 386 interpreted? *Stat Med* 2002; 21: 1559-1573.  
15 387 23. Higgins JP, Altman DG, Gotzsche PC, Juni P, Moher D, Oxman AD, Savovic J, Schulz KF,  
16 388 Weeks L, Sterne JA. The Cochrane Collaboration's tool for assessing risk of bias in  
17 389 randomised trials. *BMJ* 2011; 343: d5928.  
18 390 24. GRADEpro GDT: GRADEpro Guideline Development Tool. Ontario, Canada: McMaster  
19 391 University and Evidence Prime, Inc; 2015.  
20 392 25. Schünemann H, Brożek J, Guyatt G, Oxman A. GRADE Handbook. 2019 [cited 2019  
21 393 October 9, 2019]. Available from: <https://gdt.grade.org/app/handbook/handbook.html>.  
22 394  
23  
24  
25  
26  
27  
28  
29  
30  
31  
32  
33  
34  
35  
36  
37  
38  
39  
40  
41  
42  
43  
44  
45  
46  
47  
48  
49  
50  
51  
52  
53  
54  
55  
56  
57  
58  
59  
60



## Appendix A. Key Questions and PICOTS

### KEY QUESTIONS

1) What is the comparative effectiveness of high flow nasal oxygen versus noninvasive positive pressure ventilation (CPAP, BiPAP®) or conventional oxygen for hospitalized patients?

1a) Does comparative effectiveness of high flow nasal oxygen vary by patient characteristics, disease/diagnosis characteristics, protocol/device settings, or location of administration?

2) What are the harms of high flow nasal oxygen versus noninvasive positive pressure ventilation (CPAP, BiPAP®), invasive mechanical ventilation, or conventional oxygen for hospitalized patients?

2a) Do harms vary by patient characteristics, disease/diagnosis, protocol/device settings, or location of administration?

| PICOTS               |                                                                                                                                                                                                                                                                                                                                                                                                                                                                                                                                                                                                                                                                                                                                                                                                                                                       |
|----------------------|-------------------------------------------------------------------------------------------------------------------------------------------------------------------------------------------------------------------------------------------------------------------------------------------------------------------------------------------------------------------------------------------------------------------------------------------------------------------------------------------------------------------------------------------------------------------------------------------------------------------------------------------------------------------------------------------------------------------------------------------------------------------------------------------------------------------------------------------------------|
| <b>Population:</b>   | Hospitalized adult patients with acute respiratory failure (ARF). ARF defined as SpO <sub>2</sub> <90%, PaO <sub>2</sub> :FiO <sub>2</sub> ratio ≤300, PaO <sub>2</sub> ≤60 mmHg, or PaCO <sub>2</sub> ≥45 mmHg                                                                                                                                                                                                                                                                                                                                                                                                                                                                                                                                                                                                                                       |
| <b>Intervention:</b> | High flow nasal oxygen (humidified, ≥20 l/min)                                                                                                                                                                                                                                                                                                                                                                                                                                                                                                                                                                                                                                                                                                                                                                                                        |
| <b>Comparators:</b>  | Noninvasive positive pressure ventilation (CPAP, BiPAP®) or conventional oxygen (e.g., simple, Venturi, or nonrebreather oxygen masks)                                                                                                                                                                                                                                                                                                                                                                                                                                                                                                                                                                                                                                                                                                                |
| <b>Outcomes:</b>     | <p><b>Patient-centered Outcomes:</b> all-cause mortality (in-hospital and 90 day), intubation/reintubation (days of intubation), hospital length of stay, ICU admissions/transfers (ICU days), patient comfort, hospital readmissions (30 day) (e.g., all-cause, pneumonia), functional independence at discharge (e.g., scale scores, measures of independence/activities of daily living), discharge disposition</p> <p><b>Intermediate Outcomes:</b> respiratory rate, PaO<sub>2</sub>/FiO<sub>2</sub> ratio, SpO<sub>2</sub>, pH, PaO<sub>2</sub>, PaCO<sub>2</sub>, treatment escalation, device intolerance</p> <p><b>Cost/resource utilization</b></p> <p><b>Harms:</b> skin breakdown or pressure ulcers, gastric dysfunction, hospital-acquired pneumonia, compromised nutrition (enteral or parenteral nutrition), delirium, barotrauma</p> |
| <b>Timing:</b>       | Hospitalization for ARF or development of ARF while hospitalized; immediate post-extubation; post-surgery. Exclude pre-intubation/pre-oxygenation and HFNO oxygenation support during intubation                                                                                                                                                                                                                                                                                                                                                                                                                                                                                                                                                                                                                                                      |
| <b>Setting:</b>      | Hospital (including ICU, step down units, hospital wards), emergency department                                                                                                                                                                                                                                                                                                                                                                                                                                                                                                                                                                                                                                                                                                                                                                       |
| <b>Study Design:</b> | Randomized controlled trials, including crossover RCTs and cluster RCTs                                                                                                                                                                                                                                                                                                                                                                                                                                                                                                                                                                                                                                                                                                                                                                               |
| <b>Subgroups:</b>    | <p>Patient characteristics: age, race, gender</p> <p>Disease/diagnosis (e.g. COPD, cardiogenic pulmonary edema, immunosuppressed, post-extubation, post-surgery; hypoxic, hypercapnic, or mixed [hypoxic or hypercapnic] respiratory failure)</p> <p>Protocol/device settings (e.g., flow rate ≤30 vs. &gt;30 L/min; treatment duration &lt;6 vs. ≥6 hours)</p>                                                                                                                                                                                                                                                                                                                                                                                                                                                                                       |

BiPAP=Bilevel Positive Airway Pressure; CPAP=continuous positive airway pressure; ICU=intensive care unit; COPD= chronic obstructive pulmonary disease

### LITERATURE SEARCH

RCTs: We will search MEDLINE, Embase, CINAHL, and Cochrane Library from 2000 to August 2019

Clinicaltrials.gov for recently completed and/or on-going trials

Reference lists from relevant systematic reviews for references missed by our database searches



**Analytic Framework**



**Appendix B. MEDLINE® search strategy**

- 1 (high flow nasal adj2 (cannula\$ or oxygen\$ or therap\$ or insufflation\$)).mp.
- 2 high flow therapy.mp.
- 3 nasal high flow.mp.
- 4 high flow oxygen.mp.
- 5 (humidified high flow or humidified oxygen).mp.
- 6 (HFNC or HHFNC or HFNT or NHF or HFNO or HFOT or HFNOT).ti,ab.
- 7 (Vapotherm or Optiflow or "Comfort Flo").ti,ab.
- 8 or/1-7
- 9 remove duplicates from 8
- 10 (randomized controlled trial or controlled clinical trial).pt. or randomized.ab.
- 11 (random\$ adj (enroll\$ or assign\$ or allocat\$)).ti,ab.
- 12 ((randomi#ed or controlled or clinical) adj2 trial\$).ti,ab.
- 13 or/10-12
- 14 9 and 13
- 15 (meta-analy\$ or metaanaly\$ or meta analy\$).ti,ab.
- 16 exp Meta-Analysis/
- 17 (systematic adj2 (review\$ or overview\$)).ti,ab.
- 18 (rapid review or meta synthesis or metasyntesis or meta-synthesis or umbrella review or integrative review or data synthesis or review of reviews).ti,ab.
- 19 or/15-18
- 20 9 and 19
- 21 limit 14 to english language
- 22 limit 21 to yr="1995 -Current"
- 23 limit 22 to "all child (0 to 18 years)"
- 24 limit 23 to "all adult (19 plus years)"
- 25 22 not 23
- 26 24 or 25
- 27 limit 20 to english language
- 28 limit 27 to yr="2015 -Current"
- 29 limit 28 to "all child (0 to 18 years)"
- 30 limit 29 to "all adult (19 plus years)"
- 31 28 not 29
- 32 30 or 31

## Appendix C. Data extraction forms

Table 1. Study Characteristics

| Author, year<br>Country<br>Funding<br>Setting<br>Special population<br>Risk of Bias rating | Inclusion/Exclusion Criteria | Intervention (n)<br>Comparator (n)<br>Follow-up (primary outcome) | Demographics                                                                                                                                                                                                                                                                                                                                                                                      |
|--------------------------------------------------------------------------------------------|------------------------------|-------------------------------------------------------------------|---------------------------------------------------------------------------------------------------------------------------------------------------------------------------------------------------------------------------------------------------------------------------------------------------------------------------------------------------------------------------------------------------|
|                                                                                            | Inclusion:<br><br>Exclusion: | Intervention:<br><br>Comparator:<br><br>Follow-up:                | N=<br>Age (mean):<br>Race/ethnicity (%):<br>White:<br>Black:<br>Other:<br>Gender (% male):<br><br>Comorbidities (%):<br>Chronic Respiratory Failure:<br>COPD:<br>Congestive Heart Failure:<br><br>Comorbidity Index:<br><br>Baseline characteristics:<br>SpO <sub>2</sub> :<br>Respiratory Rate:<br>PaO <sub>2</sub> /FiO <sub>2</sub> ratio:<br>pH:<br>PaO <sub>2</sub> :<br>PaCO <sub>2</sub> : |
|                                                                                            |                              |                                                                   |                                                                                                                                                                                                                                                                                                                                                                                                   |

Table 2. Risk of Bias Assessment for Included Studies

| Author, Year | Random Sequence Generation | Allocation Concealment | Blinding of Participants/ Personnel | Blinding of Outcome Assessment | Incomplete Outcome Data | Selective Reporting | Overall Risk of Bias |
|--------------|----------------------------|------------------------|-------------------------------------|--------------------------------|-------------------------|---------------------|----------------------|
|              |                            |                        |                                     |                                |                         |                     |                      |
|              |                            |                        |                                     |                                |                         |                     |                      |
|              |                            |                        |                                     |                                |                         |                     |                      |
|              |                            |                        |                                     |                                |                         |                     |                      |

Table 3. Treatment Characteristics

| Author Year Setting Follow-up Comparator | Adherence/Intolerance describe measure |         | Treatment Settings |  |          |  | Treatment Weaning Criteria |                        |              |
|------------------------------------------|----------------------------------------|---------|--------------------|--|----------|--|----------------------------|------------------------|--------------|
|                                          | Intervention                           | Control | Protocol           |  | Received |  | Provider Discretion        | Protocol or Definition | Not Reported |
|                                          |                                        |         |                    |  |          |  |                            |                        |              |
|                                          |                                        |         |                    |  |          |  |                            |                        |              |
|                                          |                                        |         |                    |  |          |  |                            |                        |              |
|                                          |                                        |         |                    |  |          |  |                            |                        |              |

COT=conventional oxygen therapy; HFFM=high-flow face mask; HFNC=high-flow nasal cannula; NIV=non-invasive ventilation; NR=not reported; PEEP=positive end-expiratory pressure

**Table 4: Patient-Centered Outcomes, Part 1**

| Author Year<br>Setting<br>Follow-up<br>Comparator | All-cause Mortality<br>% (n/N) |         | ICU Admissions and/or Transfers<br>% (n/N)<br>(mean # of days) |         |              |         | Length of Hospital Stay<br>(mean # of days) |         |
|---------------------------------------------------|--------------------------------|---------|----------------------------------------------------------------|---------|--------------|---------|---------------------------------------------|---------|
|                                                   | Intervention                   | Control | Intervention                                                   | Control | Intervention | Control | Intervention                                | Control |
|                                                   |                                |         |                                                                |         |              |         |                                             |         |
|                                                   |                                |         |                                                                |         |              |         |                                             |         |
|                                                   |                                |         |                                                                |         |              |         |                                             |         |

CI=confidence interval; COT=conventional oxygen therapy; ED=emergency department; HR=hazard ratio; ICU=intensive care unit; IQR=interquartile range; NIV=Non-invasive ventilation; N/A=not applicable; NR=not reported; RD=risk difference; SD=standard deviation

**Table 5: Patient-Centered Outcomes, Part 2**

| Author Year<br>Setting<br>Follow-up<br>Comparator | Treatment Escalation<br>(describe) % (n/N) |         | Intubation<br>% (n/N)<br>(mean # of days) |         |              |         | Intubation Criteria |                        |              |
|---------------------------------------------------|--------------------------------------------|---------|-------------------------------------------|---------|--------------|---------|---------------------|------------------------|--------------|
|                                                   | Intervention                               | Control | Intervention                              | Control | Intervention | Control | Provider Discretion | Protocol or Definition | Not Reported |
|                                                   |                                            |         |                                           |         |              |         |                     |                        |              |
|                                                   |                                            |         |                                           |         |              |         |                     |                        |              |
|                                                   |                                            |         |                                           |         |              |         |                     |                        |              |

CI=confidence interval; COT=conventional oxygen therapy; ED=emergency department; HR=hazard ratio; ICU=intensive care unit; IQR=interquartile range; NIV=non-invasive ventilation; NR=not reported; VAS=visual analog scale

Table 6: Patient-Centered Outcomes, Part 3

| Author Year<br>Setting<br>Follow-up<br>Comparator | Discharge Disposition<br>% (n/N for each location) |         | Hospital Readmissions (30<br>day)<br>% (n/N) |         | Functional Independence<br>(mean, SD)—describe<br>measure |         | Patient Comfort (mean, SD) –<br>describe measure |         |
|---------------------------------------------------|----------------------------------------------------|---------|----------------------------------------------|---------|-----------------------------------------------------------|---------|--------------------------------------------------|---------|
|                                                   | Intervention                                       | Control | Intervention                                 | Control | Intervention                                              | Control | Intervention                                     | Control |
|                                                   |                                                    |         |                                              |         |                                                           |         |                                                  |         |
|                                                   |                                                    |         |                                              |         |                                                           |         |                                                  |         |
|                                                   |                                                    |         |                                              |         |                                                           |         |                                                  |         |
|                                                   |                                                    |         |                                              |         |                                                           |         |                                                  |         |

COT=conventional oxygen therapy; ED=emergency department; ICU=intensive care unit; IQR=interquartile range; NIV=non-invasive ventilation; NR=not reported; NS=not statistically significant

Discharge Disposition: home, assisted living facility, nursing home, long-term care hospital

Table 7: Patient-Centered Outcomes, Part 4

| Author Year<br>Setting<br>Follow-up<br>Comparator | Compromised Nutrition |         |                      |         | Gastric Dysfunction                           |         |                                                              |         |
|---------------------------------------------------|-----------------------|---------|----------------------|---------|-----------------------------------------------|---------|--------------------------------------------------------------|---------|
|                                                   | % (n/N)               |         | # days w/o nutrition |         | % (n/N) with placement of<br>nasogastric tube |         | % (n/N) with nausea,<br>vomiting, or abdominal<br>distension |         |
|                                                   | Intervention          | Control | Intervention         | Control | Intervention                                  | Control | Intervention                                                 | Control |
|                                                   |                       |         |                      |         |                                               |         |                                                              |         |
|                                                   |                       |         |                      |         |                                               |         |                                                              |         |
|                                                   |                       |         |                      |         |                                               |         |                                                              |         |
|                                                   |                       |         |                      |         |                                               |         |                                                              |         |

COT=conventional oxygen therapy; ED=emergency department; ICU=intensive care unit; NIV=non-invasive ventilation; NR=not reported

Compromised Nutrition: (enteral/parenteral nutrition or days without nutrition)

Gastric Dysfunction: (placement of a nasogastric tube for decompression or treatment of abdominal distension/nausea/vomiting)

**Table 8: Patient-Centered Outcomes, Part 5**

| Author Year<br>Setting<br>Follow-up<br>Comparator | Hospital-acquired<br>Pneumonia % (n/N) |         | Barotrauma<br>% (n/N) |         | Skin Breakdown or<br>Pressure Ulcers<br>% (n/N) |         | Delirium<br>% (n/N) |         |
|---------------------------------------------------|----------------------------------------|---------|-----------------------|---------|-------------------------------------------------|---------|---------------------|---------|
|                                                   | Intervention                           | Control | Intervention          | Control | Intervention                                    | Control | Intervention        | Control |
|                                                   |                                        |         |                       |         |                                                 |         |                     |         |
|                                                   |                                        |         |                       |         |                                                 |         |                     |         |
|                                                   |                                        |         |                       |         |                                                 |         |                     |         |

COT=conventional oxygen therapy; ED=emergency department; ICU=intensive care unit; NIV=non-invasive ventilation; N/A=not applicable; NR=not reported

Barotrauma: (pneumothorax, pneumomediastinum, pneumoperitoneum, or ventilator-induced lung injury)

**Table 9: Intermediate Outcomes, Part 1**

| Author Year<br>Setting<br>Follow-up<br>Comparator | Respiratory Rate<br>(mean, SD) |         | PaO <sub>2</sub> /FiO <sub>2</sub> ratio<br>(mean, SD) |         | SpO <sub>2</sub><br>(mean, SD) |         |
|---------------------------------------------------|--------------------------------|---------|--------------------------------------------------------|---------|--------------------------------|---------|
|                                                   | Intervention                   | Control | Intervention                                           | Control | Intervention                   | Control |
|                                                   |                                |         |                                                        |         |                                |         |
|                                                   |                                |         |                                                        |         |                                |         |
|                                                   |                                |         |                                                        |         |                                |         |

COT=conventional oxygen therapy; ED=emergency department; ICU=intensive care unit; IQR=interquartile range; NIV=non-invasive ventilation; NR=not reported; NS=not statistically significant; SD=standard deviation

**Table 10: Intermediate Outcomes, Part 2**

| Author Year<br>Setting<br>Follow-up<br>Comparator | pH<br>(mean, SD) |         | PaO <sub>2</sub><br>(mean, SD) |         | PaCO <sub>2</sub><br>(mean, SD) |         |
|---------------------------------------------------|------------------|---------|--------------------------------|---------|---------------------------------|---------|
|                                                   | Intervention     | Control | Intervention                   | Control | Intervention                    | Control |
|                                                   |                  |         |                                |         |                                 |         |
|                                                   |                  |         |                                |         |                                 |         |
|                                                   |                  |         |                                |         |                                 |         |

COT=conventional oxygen therapy; ED=emergency department; ICU=intensive care unit; NIV=non-invasive ventilation; NR=not reported; SD=standard deviation

## PRISMA-P 2015 Checklist

This checklist has been adapted for use with systematic review protocol submissions to BioMed Central journals from Table 3 in Moher D et al: Preferred reporting items for systematic review and meta-analysis protocols (PRISMA-P) 2015 statement. *Systematic Reviews* 2015 4:1

An Editorial from the Editors-in-Chief of *Systematic Reviews* details why this checklist was adapted - Moher D, Stewart L & Shekelle P: Implementing PRISMA-P: recommendations for prospective authors. *Systematic Reviews* 2016 5:15

| Section/topic                     | #  | Checklist item                                                                                                                                                                                  | Information reported                |                          | Line number(s) |
|-----------------------------------|----|-------------------------------------------------------------------------------------------------------------------------------------------------------------------------------------------------|-------------------------------------|--------------------------|----------------|
|                                   |    |                                                                                                                                                                                                 | Yes                                 | No                       |                |
| <b>ADMINISTRATIVE INFORMATION</b> |    |                                                                                                                                                                                                 |                                     |                          |                |
| <b>Title</b>                      |    |                                                                                                                                                                                                 |                                     |                          |                |
| Identification                    | 1a | Identify the report as a protocol of a systematic review                                                                                                                                        | <input checked="" type="checkbox"/> | <input type="checkbox"/> | 4-5            |
| Update                            | 1b | If the protocol is for an update of a previous systematic review, identify as such                                                                                                              | <input type="checkbox"/>            | <input type="checkbox"/> | N/a            |
| <b>Registration</b>               | 2  | If registered, provide the name of the registry (e.g., PROSPERO) and registration number in the Abstract                                                                                        | <input checked="" type="checkbox"/> | 74                       | 74             |
| <b>Authors</b>                    |    |                                                                                                                                                                                                 |                                     |                          |                |
| Contact                           | 3a | Provide name, institutional affiliation, and e-mail address of all protocol authors; provide physical mailing address of corresponding author                                                   | <input checked="" type="checkbox"/> | <input type="checkbox"/> | 7-31           |
| Contributions                     | 3b | Describe contributions of protocol authors and identify the guarantor of the review                                                                                                             | <input checked="" type="checkbox"/> | <input type="checkbox"/> | 301-306        |
| <b>Amendments</b>                 | 4  | If the protocol represents an amendment of a previously completed or published protocol, identify as such and list changes; otherwise, state plan for documenting important protocol amendments | <input type="checkbox"/>            | <input type="checkbox"/> | N/a            |
| <b>Support</b>                    |    |                                                                                                                                                                                                 |                                     |                          |                |
| Sources                           | 5a | Indicate sources of financial or other support for the review                                                                                                                                   | <input checked="" type="checkbox"/> | <input type="checkbox"/> | 308-311        |
| Sponsor                           | 5b | Provide name for the review funder and/or sponsor                                                                                                                                               | <input checked="" type="checkbox"/> | <input type="checkbox"/> | 308-311        |
| Role of sponsor/funder            | 5c | Describe roles of funder(s), sponsor(s), and/or institution(s), if any, in developing the protocol                                                                                              | <input checked="" type="checkbox"/> | <input type="checkbox"/> | 308-311        |
| <b>INTRODUCTION</b>               |    |                                                                                                                                                                                                 |                                     |                          |                |
| <b>Rationale</b>                  | 6  | Describe the rationale for the review in the context of what is already known                                                                                                                   | <input checked="" type="checkbox"/> | <input type="checkbox"/> | 98-121         |



| Section/topic                             | #   | Checklist item                                                                                                                                                                                                            | Information reported                |                          | Line number(s)     |
|-------------------------------------------|-----|---------------------------------------------------------------------------------------------------------------------------------------------------------------------------------------------------------------------------|-------------------------------------|--------------------------|--------------------|
|                                           |     |                                                                                                                                                                                                                           | Yes                                 | No                       |                    |
| <b>Objectives</b>                         | 7   | Provide an explicit statement of the question(s) the review will address with reference to participants, interventions, comparators, and outcomes (PICO)                                                                  | <input checked="" type="checkbox"/> | <input type="checkbox"/> | 122-129            |
| <b>METHODS</b>                            |     |                                                                                                                                                                                                                           |                                     |                          |                    |
| <b>Eligibility criteria</b>               | 8   | Specify the study characteristics (e.g., PICO, study design, setting, time frame) and report characteristics (e.g., years considered, language, publication status) to be used as criteria for eligibility for the review | <input checked="" type="checkbox"/> | <input type="checkbox"/> | 137-188            |
| <b>Information sources</b>                | 9   | Describe all intended information sources (e.g., electronic databases, contact with study authors, trial registers, or other grey literature sources) with planned dates of coverage                                      | <input checked="" type="checkbox"/> | <input type="checkbox"/> | 190-196            |
| <b>Search strategy</b>                    | 10  | Present draft of search strategy to be used for at least one electronic database, including planned limits, such that it could be repeated                                                                                | <input checked="" type="checkbox"/> | <input type="checkbox"/> | 190-196            |
| <b>STUDY RECORDS</b>                      |     |                                                                                                                                                                                                                           |                                     |                          |                    |
| Data management                           | 11a | Describe the mechanism(s) that will be used to manage records and data throughout the review                                                                                                                              | <input checked="" type="checkbox"/> | <input type="checkbox"/> | 206-218            |
| Selection process                         | 11b | State the process that will be used for selecting studies (e.g., two independent reviewers) through each phase of the review (i.e., screening, eligibility, and inclusion in meta-analysis)                               | <input checked="" type="checkbox"/> | <input type="checkbox"/> | 198-204            |
| Data collection process                   | 11c | Describe planned method of extracting data from reports (e.g., piloting forms, done independently, in duplicate), any processes for obtaining and confirming data from investigators                                      | <input checked="" type="checkbox"/> | <input type="checkbox"/> | 206-218            |
| <b>Data items</b>                         | 12  | List and define all variables for which data will be sought (e.g., PICO items, funding sources), any pre-planned data assumptions and simplifications                                                                     | <input checked="" type="checkbox"/> | <input type="checkbox"/> | 210-217<br>158-174 |
| <b>Outcomes and prioritization</b>        | 13  | List and define all outcomes for which data will be sought, including prioritization of main and additional outcomes, with rationale                                                                                      | <input checked="" type="checkbox"/> | <input type="checkbox"/> | 158-174            |
| <b>Risk of bias in individual studies</b> | 14  | Describe anticipated methods for assessing risk of bias of individual studies, including whether this will be done at the outcome or study level, or both; state how this information will be used in data synthesis      | <input checked="" type="checkbox"/> | <input type="checkbox"/> | 262-276            |
| <b>DATA</b>                               |     |                                                                                                                                                                                                                           |                                     |                          |                    |
| <b>Synthesis</b>                          | 15a | Describe criteria under which study data will be quantitatively synthesized                                                                                                                                               | <input checked="" type="checkbox"/> | <input type="checkbox"/> | 220-238            |

| Section/topic                            | #   | Checklist item                                                                                                                                                                                                                              | Information reported                |                          | Line number(s) |
|------------------------------------------|-----|---------------------------------------------------------------------------------------------------------------------------------------------------------------------------------------------------------------------------------------------|-------------------------------------|--------------------------|----------------|
|                                          |     |                                                                                                                                                                                                                                             | Yes                                 | No                       |                |
|                                          | 15b | If data are appropriate for quantitative synthesis, describe planned summary measures, methods of handling data, and methods of combining data from studies, including any planned exploration of consistency (e.g., $I^2$ , Kendall's tau) | <input checked="" type="checkbox"/> | <input type="checkbox"/> | 220-238        |
|                                          | 15c | Describe any proposed additional analyses (e.g., sensitivity or subgroup analyses, meta-regression)                                                                                                                                         | <input checked="" type="checkbox"/> | <input type="checkbox"/> | 231-260        |
|                                          | 15d | If quantitative synthesis is not appropriate, describe the type of summary planned                                                                                                                                                          | <input checked="" type="checkbox"/> | <input type="checkbox"/> | 238-239        |
| <b>Meta-bias(es)</b>                     | 16  | Specify any planned assessment of meta-bias(es) (e.g., publication bias across studies, selective reporting within studies)                                                                                                                 | <input checked="" type="checkbox"/> | <input type="checkbox"/> | 272-276        |
| <b>Confidence in cumulative evidence</b> | 17  | Describe how the strength of the body of evidence will be assessed (e.g., GRADE)                                                                                                                                                            | <input checked="" type="checkbox"/> | <input type="checkbox"/> | 278-281        |
