# Supplementary material for: Effectiveness and harms of high-flow nasal oxygen (HFNO) for acute respiratory failure: a systematic review protocol
Source: PubMed Central journal article supplement — BMJ Open. 2020 Feb 12;10(2):e034956. doi: 10.1136/bmjopen-2019-034956 (PMC7044882; doi:10.1136/bmjopen-2019-034956), 2020-02-12
Supplement: bmjopen-2019-034956supp002.pdf [file bmjopen-2019-034956supp002.pdf]

**Appendix B. MEDLINE® search strategy**

- 1 (high flow nasal adj2 (cannula\$ or oxygen\$ or therap\$ or insufflation\$)).mp.
- 2 high flow therapy.mp.
- 3 nasal high flow.mp.
- 4 high flow oxygen.mp.
- 5 (humidified high flow or humidified oxygen).mp.
- 6 (HFNC or HHFNC or HFNT or NHF or HFNO or HFOT or HFNOT).ti,ab.
- 7 (Vapotherm or Optiflow or "Comfort Flo").ti,ab.
- 8 or/1-7
- 9 remove duplicates from 8
- 10 (randomized controlled trial or controlled clinical trial).pt. or randomized.ab.
- 11 (random\$ adj (enroll\$ or assign\$ or allocat\$)).ti,ab.
- 12 ((randomi#ed or controlled or clinical) adj2 trial\$).ti,ab.
- 13 or/10-12
- 14 9 and 13
- 15 (meta-analy\$ or metaanaly\$ or meta analy\$).ti,ab.
- 16 exp Meta-Analysis/
- 17 (systematic adj2 (review\$ or overview\$)).ti,ab.
- 18 (rapid review or meta synthesis or metasyntesis or meta-synthesis or umbrella review or integrative review or data synthesis or review of reviews).ti,ab.
- 19 or/15-18
- 20 9 and 19
- 21 limit 14 to english language
- 22 limit 21 to yr="1995 -Current"
- 23 limit 22 to "all child (0 to 18 years)"
- 24 limit 23 to "all adult (19 plus years)"
- 25 22 not 23
- 26 24 or 25
- 27 limit 20 to english language
- 28 limit 27 to yr="2015 -Current"
- 29 limit 28 to "all child (0 to 18 years)"
- 30 limit 29 to "all adult (19 plus years)"
- 31 28 not 29
- 32 30 or 31
