# Supplementary material for: Effectiveness and harms of high-flow nasal oxygen (HFNO) for acute respiratory failure: a systematic review protocol
Source: PubMed Central journal article supplement — BMJ Open. 2020 Feb 12;10(2):e034956. doi: 10.1136/bmjopen-2019-034956 (PMC7044882; doi:10.1136/bmjopen-2019-034956), 2020-02-12
Supplement: bmjopen-2019-034956supp003.pdf [file bmjopen-2019-034956supp003.pdf]

## Appendix C. Data extraction forms

Table 1. Study Characteristics

| Author, year<br>Country<br>Funding<br>Setting<br>Special population<br>Risk of Bias rating | Inclusion/Exclusion Criteria | Intervention (n)<br>Comparator (n)<br>Follow-up (primary outcome) | Demographics                                                                                                                                                                                                                                                                                                                                                                                      |
|--------------------------------------------------------------------------------------------|------------------------------|-------------------------------------------------------------------|---------------------------------------------------------------------------------------------------------------------------------------------------------------------------------------------------------------------------------------------------------------------------------------------------------------------------------------------------------------------------------------------------|
|                                                                                            | Inclusion:<br><br>Exclusion: | Intervention:<br><br>Comparator:<br><br>Follow-up:                | N=<br>Age (mean):<br>Race/ethnicity (%):<br>White:<br>Black:<br>Other:<br>Gender (% male):<br><br>Comorbidities (%):<br>Chronic Respiratory Failure:<br>COPD:<br>Congestive Heart Failure:<br><br>Comorbidity Index:<br><br>Baseline characteristics:<br>SpO <sub>2</sub> :<br>Respiratory Rate:<br>PaO <sub>2</sub> /FiO <sub>2</sub> ratio:<br>pH:<br>PaO <sub>2</sub> :<br>PaCO <sub>2</sub> : |
|                                                                                            |                              |                                                                   |                                                                                                                                                                                                                                                                                                                                                                                                   |

**Table 2. Risk of Bias Assessment for Included Studies**

| Author, Year | Random Sequence Generation | Allocation Concealment | Blinding of Participants/ Personnel | Blinding of Outcome Assessment | Incomplete Outcome Data | Selective Reporting | Overall Risk of Bias |
|--------------|----------------------------|------------------------|-------------------------------------|--------------------------------|-------------------------|---------------------|----------------------|
|              |                            |                        |                                     |                                |                         |                     |                      |
|              |                            |                        |                                     |                                |                         |                     |                      |
|              |                            |                        |                                     |                                |                         |                     |                      |

**Table 3. Treatment Characteristics**

| Author Year Setting Follow-up Comparator | Adherence/Intolerance describe measure |         | Treatment Settings |         |              |         | Treatment Weaning Criteria |                        |              |
|------------------------------------------|----------------------------------------|---------|--------------------|---------|--------------|---------|----------------------------|------------------------|--------------|
|                                          | Intervention                           | Control | Protocol           |         | Received     |         | Provider Discretion        | Protocol or Definition | Not Reported |
|                                          |                                        |         | Intervention       | Control | Intervention | Control |                            |                        |              |
|                                          |                                        |         |                    |         |              |         |                            |                        |              |
|                                          |                                        |         |                    |         |              |         |                            |                        |              |
|                                          |                                        |         |                    |         |              |         |                            |                        |              |

COT=conventional oxygen therapy; HFFM=high-flow face mask; HFNC=high-flow nasal cannula; NIV=non-invasive ventilation; NR=not reported; PEEP=positive end-expiratory pressure

**Table 4: Patient-Centered Outcomes, Part 1**

| Author Year<br>Setting<br>Follow-up<br>Comparator | All-cause Mortality<br>% (n/N) |         | ICU Admissions and/or Transfers<br>% (n/N)<br>(mean # of days) |         |              |         | Length of Hospital Stay<br>(mean # of days) |         |
|---------------------------------------------------|--------------------------------|---------|----------------------------------------------------------------|---------|--------------|---------|---------------------------------------------|---------|
|                                                   | Intervention                   | Control | Intervention                                                   | Control | Intervention | Control | Intervention                                | Control |
|                                                   |                                |         |                                                                |         |              |         |                                             |         |
|                                                   |                                |         |                                                                |         |              |         |                                             |         |
|                                                   |                                |         |                                                                |         |              |         |                                             |         |

CI=confidence interval; COT=conventional oxygen therapy; ED=emergency department; HR=hazard ratio; ICU=intensive care unit; IQR=interquartile range; NIV=Non-invasive ventilation; N/A=not applicable; NR=not reported; RD=risk difference; SD=standard deviation

**Table 5: Patient-Centered Outcomes, Part 2**

| Author Year<br>Setting<br>Follow-up<br>Comparator | Treatment Escalation<br>(describe) % (n/N) |         | Intubation<br>% (n/N)<br>(mean # of days) |         |              |         | Intubation Criteria    |                           |                 |
|---------------------------------------------------|--------------------------------------------|---------|-------------------------------------------|---------|--------------|---------|------------------------|---------------------------|-----------------|
|                                                   | Intervention                               | Control | Intervention                              | Control | Intervention | Control | Provider<br>Discretion | Protocol or<br>Definition | Not<br>Reported |
|                                                   |                                            |         |                                           |         |              |         |                        |                           |                 |
|                                                   |                                            |         |                                           |         |              |         |                        |                           |                 |
|                                                   |                                            |         |                                           |         |              |         |                        |                           |                 |

CI=confidence interval; COT=conventional oxygen therapy; ED=emergency department; HR=hazard ratio; ICU=intensive care unit; IQR=interquartile range; NIV=non-invasive ventilation; NR=not reported; VAS=visual analog scale

**Table 6: Patient-Centered Outcomes, Part 3**

| Author Year<br>Setting<br>Follow-up<br>Comparator | Discharge Disposition<br>% (n/N for each location) |         | Hospital Readmissions (30<br>day)<br>% (n/N) |         | Functional Independence<br>(mean, SD)—describe<br>measure |         | Patient Comfort (mean, SD) –<br>describe measure |         |
|---------------------------------------------------|----------------------------------------------------|---------|----------------------------------------------|---------|-----------------------------------------------------------|---------|--------------------------------------------------|---------|
|                                                   | Intervention                                       | Control | Intervention                                 | Control | Intervention                                              | Control | Intervention                                     | Control |
|                                                   |                                                    |         |                                              |         |                                                           |         |                                                  |         |
|                                                   |                                                    |         |                                              |         |                                                           |         |                                                  |         |
|                                                   |                                                    |         |                                              |         |                                                           |         |                                                  |         |

COT=conventional oxygen therapy; ED=emergency department; ICU=intensive care unit; IQR=interquartile range; NIV=non-invasive ventilation; NR=not reported; NS=not statistically significant

Discharge Disposition: home, assisted living facility, nursing home, long-term care hospital

**Table 7: Patient-Centered Outcomes, Part 4**

| Author Year<br>Setting<br>Follow-up<br>Comparator | Compromised Nutrition |         |                      |         | Gastric Dysfunction                           |         |                                                              |         |
|---------------------------------------------------|-----------------------|---------|----------------------|---------|-----------------------------------------------|---------|--------------------------------------------------------------|---------|
|                                                   | % (n/N)               |         | # days w/o nutrition |         | % (n/N) with placement of<br>nasogastric tube |         | % (n/N) with nausea,<br>vomiting, or abdominal<br>distension |         |
|                                                   | Intervention          | Control | Intervention         | Control | Intervention                                  | Control | Intervention                                                 | Control |
|                                                   |                       |         |                      |         |                                               |         |                                                              |         |
|                                                   |                       |         |                      |         |                                               |         |                                                              |         |
|                                                   |                       |         |                      |         |                                               |         |                                                              |         |

COT=conventional oxygen therapy; ED=emergency department; ICU=intensive care unit; NIV=non-invasive ventilation; NR=not reported

Compromised Nutrition: (enteral/parenteral nutrition or days without nutrition)

Gastric Dysfunction: (placement of a nasogastric tube for decompression or treatment of abdominal distension/nausea/vomiting)

**Table 8: Patient-Centered Outcomes, Part 5**

| Author Year<br>Setting<br>Follow-up<br>Comparator | Hospital-acquired<br>Pneumonia % (n/N) |         | Barotrauma<br>% (n/N) |         | Skin Breakdown or<br>Pressure Ulcers<br>% (n/N) |         | Delirium<br>% (n/N) |         |
|---------------------------------------------------|----------------------------------------|---------|-----------------------|---------|-------------------------------------------------|---------|---------------------|---------|
|                                                   | Intervention                           | Control | Intervention          | Control | Intervention                                    | Control | Intervention        | Control |
|                                                   |                                        |         |                       |         |                                                 |         |                     |         |
|                                                   |                                        |         |                       |         |                                                 |         |                     |         |
|                                                   |                                        |         |                       |         |                                                 |         |                     |         |

COT=conventional oxygen therapy; ED=emergency department; ICU=intensive care unit; NIV=non-invasive ventilation; N/A=not applicable; NR=not reported

Barotrauma: (pneumothorax, pneumomediastinum, pneumoperitoneum, or ventilator-induced lung injury)

**Table 9: Intermediate Outcomes, Part 1**

| Author Year<br>Setting<br>Follow-up<br>Comparator | Respiratory Rate<br>(mean, SD) |         | PaO <sub>2</sub> /FiO <sub>2</sub> ratio<br>(mean, SD) |         | SpO <sub>2</sub><br>(mean, SD) |         |
|---------------------------------------------------|--------------------------------|---------|--------------------------------------------------------|---------|--------------------------------|---------|
|                                                   | Intervention                   | Control | Intervention                                           | Control | Intervention                   | Control |
|                                                   |                                |         |                                                        |         |                                |         |
|                                                   |                                |         |                                                        |         |                                |         |
|                                                   |                                |         |                                                        |         |                                |         |

COT=conventional oxygen therapy; ED=emergency department; ICU=intensive care unit; IQR=interquartile range; NIV=non-invasive ventilation; NR=not reported; NS=not statistically significant; SD=standard deviation

**Table 10: Intermediate Outcomes, Part 2**

| Author Year<br>Setting<br>Follow-up<br>Comparator | pH<br>(mean, SD) |         | PaO <sub>2</sub><br>(mean, SD) |         | PaCO <sub>2</sub><br>(mean, SD) |         |
|---------------------------------------------------|------------------|---------|--------------------------------|---------|---------------------------------|---------|
|                                                   | Intervention     | Control | Intervention                   | Control | Intervention                    | Control |
|                                                   |                  |         |                                |         |                                 |         |
|                                                   |                  |         |                                |         |                                 |         |
|                                                   |                  |         |                                |         |                                 |         |

COT=conventional oxygen therapy; ED=emergency department; ICU=intensive care unit; NIV=non-invasive ventilation; NR=not reported; SD=standard deviation
